1       **PSK signaling controls ABA homeostasis and signaling genes and**  
2                   **maintains shoot growth under osmotic stress**

3  
4       Komathy Rajamanickam<sup>1</sup>, Martina D. Schönhof<sup>1</sup>, Bettina Hause<sup>2</sup>, Margret Sauter<sup>1</sup>

5  
6       <sup>1</sup>Plant Developmental Biology and Plant Physiology, University of Kiel, Kiel, Germany

7       <sup>2</sup>Department of Cell and Metabolic Biology, Leibniz Institute of Plant Biochemistry, Halle  
8       (Saale), Germany

9  
10  
11       **Corresponding author**

12       Margret Sauter, [msauter@bot.uni-kiel.de](mailto:msauter@bot.uni-kiel.de)

13  
14  
15  
16       date of submission: 22.04.2021

17       number of figures: 10

18       number of supplementary figures: 11

19       number of supplementary tables: 1

20       word count: 5013

21  
22       **Running title**

23       PSKRs protect shoots during water stress

24  
25  
26       **Highlight**

27       Phytosulfokine receptor signaling regulates ABA synthesis and signaling genes and  
28       promotes ABA accumulation in the shoot of water-stressed plants and maintains leaf  
29       growth and photosynthetic efficiency which ensures plant health.

31 **ABSTRACT**

32  
33  
34 Water deficit impairs growth and survival of plants. Many water stress responses are  
35 under control of abscisic acid (ABA) but little is known about growth control under osmotic  
36 stress. Based on the previously described growth-promoting activity of the peptide  
37 hormone phytosulfokine (PSK), we hypothesized that it may contribute to growth  
38 regulation under water stress conditions. To test this hypothesis, we analyzed the  
39 *Arabidopsis thaliana* PSK receptor (PSKR) null mutant *pskr1-3 pskr2-1* under mannitol  
40 and drought stress. In particular under mild water stress, fresh weight and photosynthetic  
41 efficiency were more reduced in *pskr1-3 pskr2-1* than in wild type. Hydroponic and grafting  
42 experiments showed that PSKR signaling was not required for long-distance signaling  
43 from mannitol-stressed roots to shoot but rather for cell growth promotion in the shoot.  
44 Unlike wild type, *pskr1-3 pskr2-1* shoots did not accumulate ABA in response to mannitol,  
45 showed misregulation of ABA synthesis genes and elevated expression of *ABI1* and *ABI2*,  
46 repressors of ABA signaling whereas application of ABA partially reversed shoot growth  
47 inhibition by mannitol in *pskr1-3 pskr2-1*. In turn, mannitol and ABA induced expression of  
48 *PSK3* and *PSKR1*, and ABA promoted expression of *PSK2* and *PSK4* revealing feedback  
49 regulatory loops between PSKR and osmotic stress signaling.

50

51

52 **Key words**

53 Peptide signaling, PSK receptor, drought stress, mannitol, grafting, growth,  
54 photosynthesis, leaf growth, abscisic acid, osmotic stress

55

## 56 INTRODUCTION

57  
58 Water deficit is a major challenge for plants as it impairs growth and ultimately  
59 survival. It is a result of osmotic stress brought about by drought or high salinity. The non-  
60 ionic osmolyte mannitol is frequently used in osmotic stress and plant growth research  
61 (Nikonorova *et al.*, 2018; Kalve *et al.*, 2020). Osmotic stress induces responses to  
62 ameliorate the stress conditions such as a reduction of water loss through stomatal  
63 closure (Munemasa *et al.*, 2015). The plant hormone abscisic acid (ABA) accumulates in  
64 plant shoots following drought or osmotic stress and controls stoma closure and  
65 transcriptional changes (Bartels and Sunkar, 2005; Yamaguchi-Shinozaki and Shinozaki,  
66 2006; Finkelstein, 2013, Takahashi *et al.*, 2020). In addition, ABA-independent pathways  
67 of osmotic stress resistance exist.

68 Active ABA levels are determined by synthesis, degradation, inactivation and  
69 remobilization. ABA is synthesized from xanthophylls. Nine-*cis*-epoxycarotenoid  
70 dioxygenase (NCED) catalyze a key regulated step (Luchi *et al.*, 2001; Schwartz *et al.*,  
71 2003) and aldehyde oxidases (AO) catalyze the conversion of abscisic aldehyde to ABA  
72 (Seo *et al.*, 2000). Degradation of ABA is initiated by ABA 8'-hydroxylase, an enzyme that  
73 is encoded by four members of the cytochrome P450 CYP707A family in Arabidopsis  
74 (Kushiro *et al.*, 2004; Saito *et al.*, 2004). ABA hydroxylation has been identified as the key  
75 step in ABA catabolism (Dejonghe *et al.*, 2018). However, inactivation of ABA also occurs  
76 through conjugation to glucose by ABA UDP-glucosyltransferase (UGT) encoded by  
77 *UGT71B6-B8*, in Arabidopsis (Dong *et al.*, 2014). ABA-glucose ester is a storage form of  
78 ABA that can be remobilized by ABA glucosidases BG1 and BG2 (Lee *et al.*, 2006). Thus,  
79 ABA homeostasis depends on synthesis and inactivation pathways whereby many of the  
80 genes involved are regulated in response to dehydration and other stresses (Xu *et al.*,  
81 2013).

82 Water deficit is first perceived in the root and from there communicated to the shoot.  
83 Among other drought-induced signals that move from root to shoot is the signaling peptide  
84 CLAVATA3/EMBRYO-SURROUNDING REGION-RELATED 25 (CLE25) that moves through the  
85 vasculature to leaves where it is perceived by BAM receptor-like kinases (Takahashi *et al.*, 2018;  
86 Takahashi *et al.*, 2019). CLE25/BAM signaling activates NCED3, a key gene in ABA  
87 biosynthesis and thereby contributes to ABA-dependent drought adaptation. The study

88 revealed a crucial role of signaling peptides and receptor-like kinases in plant adaptation  
89 to water deficit.

90       Phytosulfokine (PSK) belongs to the group of secreted signaling peptides (Sauter,  
91 2015; Kaufmann und Sauter, 2019). PSK is perceived by PSK receptors at the plasma  
92 membrane that belong to the leucine-rich repeat receptor-like kinase family encoded by  
93 two genes, PSKR1 and PSKR2, in *Arabidopsis thaliana* (Matsubayashi *et al.*, 2006).  
94 Knockout of both receptor genes impairs root elongation and shoot growth whereas  
95 exposure of wild-type seedlings to PSK promotes growth by enhancing cell expansion  
96 (Kutschmar *et al.*, 2009; Stührwohldt *et al.*, 2011). At the molecular level, PSKR1 interacts  
97 with the co-receptor Brassinosteroid-insensitive (BAK1) and the H<sup>+</sup>-ATPases AHA1 and  
98 AHA2, and indirectly through BAK1 and AHAs with the Cyclic nucleotide-gated channel  
99 17 (CNGC17). These proteins assemble in a nanocluster at the plasma membrane and  
100 were proposed to form a functional unit that drives cell expansion (Ladwig *et al.*, 2015).  
101 PSKR signaling promotes protoplast expansion in a CNGC17-dependent manner and was  
102 proposed to lead to cell wall acidification, water uptake, accompanied by osmotic  
103 adjustment, and consequently to expansion of cells.

104       Low water potential prevents water uptake and limits cell expansion resulting in  
105 reduced growth rates under drought conditions. While physiological responses to water-  
106 deficit, foremost stoma closure, have been well studied, the question, if growth inhibition  
107 by osmotic constraint is balanced by a growth-promoting pathway to prevent an extreme  
108 stress response resulting in growth arrest, has not been resolved. It is clear however that  
109 an, albeit reduced, growth rate is maintained in plants despite of osmotic constraints. In  
110 support of the hypothesis that PSK signaling maintains plant growth under osmotic stress  
111 a recent study demonstrated that PSK precursor processing is required to promote root  
112 growth in response to the osmolyte mannitol in *Arabidopsis* (Stührwohldt *et al.*, 2021).

113       Shoot growth is a more sensitive indicator to stress (Claeys *et al.*, 2014) and was  
114 studied here to further investigate the role of PSKR signaling in response to osmotic  
115 stress. Our results show that PSKR signaling in the shoot is required to maintain shoot  
116 growth under mild osmotic stress, in part through altered ABA synthesis and signaling.

117

118

119

## 120 MATERIALS AND METHODS

121

### 122 Plant material and growth conditions

123

124 All experiments were performed with *Arabidopsis thaliana* (L.) Heynh. ecotype Columbia  
125 (Col-0) and mutants in the Col-0 background. The lines used were described previously  
126 as indicated: *pskr1-3* (Kutschmar *et al.*, 2009; Stührwohldt *et al.*, 2011), *pskr2-1* (Amano  
127 *et al.*, 2007; Stührwohldt *et al.*, 2011), *pskr1-2 pskr2-1* (Stührwohldt *et al.*, 2011; Hartmann  
128 *et al.*, 2013), *PSKR1ox2* and *PSKR1ox12* (Hartmann *et al.*, 2013), *35S:PSKR1-GFP*  
129 (Hartmann *et al.*, 2015). For GUS analyses of PSK receptors the lines *PSKR1:GUS-4*  
130 (Kutschmar *et al.*, 2009; Stührwohldt *et al.*, 2011) and *PSKR2:GUS-3* were used. For  
131 growth on plates, seeds were surface-sterilized for 25 min with 2% (w/v) sodium  
132 hypochlorite (NaOCl) followed by four washing steps with autoclaved water and placed  
133 on square plates containing half-strength MS medium (Murashige & Skoog, 1962; basal  
134 salt mixture, Duchefa Biochemie) and 1% (w/v) sucrose, solidified with 0.4% Gelrite  
135 (Duchefa Biochemie). After two days of stratification at 4°C in the dark, plates were  
136 transferred to long day conditions with a 16 h light (70  $\mu\text{M photons m}^{-2} \text{s}^{-1}$ ) and 8 h dark  
137 cycle at 22°C and 60% humidity.

138 For germination and greening assays, wild type and mutant parental plants were  
139 grown and harvested at the same time to ensure equal seed quality. Seeds were placed  
140 on medium supplemented with or without 1  $\mu\text{M}$  (+)-*cis*, *trans*-abscisic acid (ABA) (Duchefa  
141 Biochemie), 350  $\mu\text{M}$  mannitol and/or 1  $\mu\text{M}$  PSK (Pepscan). PSK and ABA were always  
142 added freshly. ABA was diluted right before use. The penetration of the endosperm or  
143 testa by the embryo radicle was counted as successful germination event. Three  
144 independent experiments were performed with 100 seeds each per genotype per  
145 treatment.

146 To analyze shoot growth under stress conditions, seedlings were pregrown  
147 vertically under sterile conditions for 4 days to complete germination and cotyledon  
148 greening (Supplemental Fig. S6) and subsequently transferred to new plates  
149 supplemented with mannitol, sorbitol and/or ABA as indicated and grown for the times  
150 indicated. Growth was quantified with a fine scale as shoot fresh weight or shoot dry  
151 weight. Plant pictures are shown on a black background for better visualization. Primary

152 root lengths were determined 7 days after transfer of 4-day-old seedlings to mannitol  
153 because the roots reached the bottom of the plate after longer times making it impossible  
154 to measure root lengths later on.

155 For grafting, 6-day-old seedlings were grown on agar plates (0.5X MS pH 5.8; 0.5%  
156 (w/v) sucrose; 1% (w/v) agar) at short-day conditions (8 h light and 16 h dark). Grafting  
157 was performed as described (Marsch-Martínez *et al.*, 2013). The rootstock and scion were  
158 prepared under sterile conditions by excising the hypocotyl of the seedlings. Cotyledons  
159 were also excised to improve healing. Adventitious roots were removed immediately when  
160 they appeared. The grafted plants were allowed to recover for 14 days and successful  
161 grafts were chosen for osmotic stress experiments with mannitol. Plants were grown on  
162 manitol or mannitol-free medium as indicated was for another 14 days prior to analysis.

163

#### 164 **Drought experiment and plant analysis**

165

166 Plants were grown in square pots (7x7x8 cm) on soil for three weeks under well-watered  
167 conditions with 50 ml of water every third day. After three weeks, the soil was water-  
168 saturated for 3 days and, subsequently, plants were watered every 3 days with 5 ml for  
169 another 3 weeks. Pots with control plants remained well-watered as before. Drought  
170 experiments were repeated three times and growth was quantified as shoot fresh weight.

171 For chlorophyll fluorescence measurements, an IMAGING-PAM chlorophyll  
172 fluorometer (Maxi version with blue measuring light, Walz, Effeltrich, Germany) was used.  
173 Plants were dark-adapted for 30 minutes prior to image capture. The maximum quantum  
174 yield of photosystem II (PS II) was measured as the ratio of  $F_v/F_m = (F_m - F_o)/F_m$ , where  
175  $F_o$  is the minimum fluorescence measured using a weak excitation beam (setting 1 with  
176 1 Hz),  $F_m$  is the maximum fluorescence measured by applying a saturated light pulse  
177 ( $2,500 \mu\text{mol photons m}^{-2} \text{s}^{-1}$ ) and  $F_v$  is the variable fluorescence ( $F_m - F_o$ ). Subsequently,  
178 plants were exposed to saturating pulses with background illumination and  $\Delta F/F_m'$   
179 measurement was done under steady state conditions.  $\Delta F/F_m'$  was calculated using the  
180 formula  $(F_m' - F)/F_m'$ , where the prime (') denotes actinic light. Images and measurements  
181 were obtained using Imaging Win V2.41a software (Walz).

182

183

## 184 **Histochemical GUS analysis**

185  
186 To analyze spatial distribution of *PSKR* and *PSK* expression  $\beta$ -glucuronidase (GUS)  
187 assays were performed as described (Weigel & Glazebrook, 2002) with minor changes.  
188 Seedlings were collected in 90% (v/v) isopropanol, incubated for 10 minutes and washed  
189 with 50 mM sodium phosphate buffer (pH 7.2). Staining was performed for 15 h and  
190 stopped by transferring the seedlings to 70% (v/v) ethanol. Tissues were cleared with a  
191 chloral hydrate:deionized water:glycerol 6:2:1 (g/ml/ml) mixture that was added on  
192 microscopy slides instead of water. Seedlings were visualized under bright-field  
193 illumination with a Nikon SMZ18 binocular (Nikon) and photographed with a DIGITAL  
194 SIGHT-Ri1 camera (Olympus).

195

## 196 **RNA isolation, RT-PCR and quantitative real time PCR**

197  
198 Total RNA was isolated from true leaves using TRI Reagent (Merck) following  
199 manufacturer's protocol. cDNA was synthesized from 1  $\mu$ g DNase I-treated (Thermo  
200 Fisher Scientific) total RNA by oligo(dT)-primed reverse transcription using RevertAid  
201 Reverse Transcriptase (Thermo Fisher Scientific). To avoid gDNA contamination and to  
202 ensure an equal amount of RNA input, cDNA was tested by PCR for *ACTIN2* (At3g18780)  
203 transcripts prior to qPCR analysis with the primers ACT2for 5'-  
204 CAAAGACCAGCTCTTCCATCG-3' and ACT2rev 5'-CTGTGAACGATTCCTGGACCT 3'.  
205 qPCR was used to examine the expression of *PSKR1*, *PSKR2*, *PSK1*, *PSK2*, *PSK3*,  
206 *PSK4*, *PSK5*, *NCED3*, *NCED5*, *NCED9*, *CYP707A1*, *CYP707A2*, *CYP77A3*, *CYP707A4*,  
207 *UGT71B6*, *UGT71B7*, *UGT71B8*, *BG1*, *BG2*, *AAO1*, *AAO2*, *ABI1* and *ABI2* with primers  
208 listed in Supplemental Table 1 using the Rotor Gene SYBR Green PCR Kit (Qiagen)  
209 according to manufacturers' protocol in a Rotor gene Q cycler (Qiagen). Ten ng cDNA per  
210 sample were applied in a total volume of 15  $\mu$ l. Estimation of raw data was done with the  
211 Rotor-Gene Q 2.3.1.49 (Qiagen) program.

212 The relative transcript abundance was calculated based on the  $\Delta\Delta$ CP method  
213 including primer efficiency to normalize the data with two reference genes (Pfaffl, 2001;  
214 Van Desompele *et al.*, 2007). In relation to each reference gene (*ACT2* and  
215 GLYCERALDEHYDE-3-PHOSPHATE DEHYDROGENASE 1 (*GAPC1*)) (Supplemental



216 Table 1) values were averaged from three independent biological replicates with two  
217 technical replicates each. The expression of wild type under control conditions was set to  
218 1 and all other values were calculated as fold change of that.

219

## 220 **ABA measurement**

221

222 Four-day-old seedlings were transferred to medium containing mannitol as indicated and  
223 grown for additional 7 days. Roots and shoots were harvested separately and immediately  
224 frozen in liquid nitrogen. About 50 mg of homogenized, frozen material was extracted with  
225 500  $\mu$ l of methanol containing isotope-labelled internal standard  $^2\text{H}_6$ -ABA ( $0.1 \text{ ng } \mu\text{l}^{-1}$ )  
226 followed by centrifugation. The supernatant was diluted with 4.5 ml water and subjected  
227 to solid-phase extraction on HR-XC (Chromabond, Macherey-Nagel, Düren, Germany)  
228 column. Fractions containing ABA were eluted with acetonitrile and separated using the  
229 ACQUITY UPLC System (Waters, Eschborn, Germany) (Balcke *et al.* 2012). Detection of  
230 ABA and  $^2\text{H}_6$ -ABA was done by ESI-tandem mass spectrometry (MS/MS) using a 3200 Q  
231 TRAP<sup>®</sup> LC/MS/MS mass spectrometer (Waters) (Balcke *et al.*, 2012). ABA content per  
232 sample was calculated using the ratio of ABA and  $^2\text{H}_6$ -ABA peak heights. Data were  
233 obtained from 5 biological replicates each.

234 To an alternative method to measure changes in ABA levels in response to  
235 mannitol, we obtained the *ABAleon2.1* line and the plasmid *barII-UT-ABAleon2.1* from  
236 Rainer Waadt (Waadt *et al.*, 2014) that we used to generate a homozygous *pskr1-3 pskr2-*  
237 *1 ABAleon2.1* line. Plants were transformed with *Agrobacterium tumefaciens EHA105*,  
238 containing the *barII-UT-ABAleon2.1* construct with the floral dip method (Clough and Bent,  
239 1998). The progeny were selected with BASTA<sup>®</sup>. In the T2 generation the seedlings were  
240 additionally screened with the FastGene<sup>®</sup> Blue/Green LED Flashlight (Nippon Genetics  
241 Europe GmbH) with an orange/blue filter to exclude silencing of the transgene. Acceptor  
242 photobleaching Förster resonance energy transfer (FRET) was used to measure relative  
243 differences in ABA levels in each genotype using a Leica SP5 CLSM. Cells were excited  
244 sequentially at 458 and 514 nm and emission recorded with adequate filter sets. Post-  
245 bleach images were captured at 458 nm excitation (Supplemental Fig. S8). FRET is  
246 visualized as an increase in mTurquoise fluorescence following cpVenus173  
247 photobleaching (Supplemental Figure S8). FRET efficiency was calculated according to



248 the formula  $FRET_{eff} = (D_{post} - D_{pre}) / D_{post}$  with  $D_{post}$  =fluorescence intensity of the donor after  
249 acceptor photobleaching and  $D_{pre}$  =fluorescence intensity of the donor before acceptor  
250 photobleaching.

251

## 252 **Statistical analysis**

253

254 Statistical analyses were done using Minitab® 16.1. Data that were not distributed  
255 normally were evaluated using a Kruskal-Wallis or Mann-Whitney test for pairwise  
256 comparison. Normally distributed data were tested for equal variance. In the case of equal  
257 variance, ANOVA, otherwise a t-test for pairwise comparison was chosen.

258

## 259 **Accession numbers**

260

261 *ACT2* - At3g18780, *GAPC1* - At3g04120, *PSKR1* - At2g02220, *PSKR2* - At5g53890,  
262 *PSK1* - At1g13590, *PSK2* - At2g22860, *PSK3* - At3g44735, *PSK4* - At3g49780, *PSK5* -  
263 At5g65870, *NCED3* - At3g14440, *NCED5* - At1g30100, *NCED9* - At1g78390, *CYP707A1*  
264 - At4g19230, *CYP707A2* - At2g29090, *CYP707A3* - At5g45340, *CYP707A4* - At3g19270,  
265 *UGT71B6* - At3g21780, *UGT71B7* - At3g21790, *UGT71B8* - At3g21800, *BG1* -  
266 At1g52400, *BG2* - At2g32860, *AAO1* - At5g20960, *AAO2* - At3g43600, *ABI1* - At4g26080,  
267 *ABI2* - At5g57050.

268

269

## 270 **RESULTS**

271

### 272 **PSKR1 promotes shoot growth under osmotic stress**

273

274 PSK signaling is known to promote root and shoot growth (Sauter, 2015). A recent report  
275 demonstrated that PSK precursor synthesis and precursor processing by subtilisin serine  
276 proteases enhance root growth under mannitol stress conditions revealing a role of PSK  
277 signaling of growth under osmotic stress (Stührwohldt *et al.*, 2021). To better understand  
278 PSK signaling of growth under osmotic stress, we employed the PSK receptor null line  
279 *pskr1-3 pskr2-1* (Stührwohldt *et al.*, 2011; Hartmann *et al.*, 2013) and focussed on shoot

280 growth of seedlings exposed to mannitol. Seedlings were grown for 4 days without  
281 mannitol, then transferred to plates containing 0, 25 mM, 50 mM, 100 mM or 200 mM  
282 mannitol. Shoot growth was analyzed after an additional 2 weeks (Fig. 1). Wild type  
283 seedlings displayed inhibition of shoot size, shoot fresh weight and shoot dry weight by  
284 mannitol in a dose-dependent manner, a phenotype that was exacerbated in *pskr1-3*  
285 *pskr2-1* seedlings (Fig. 1A, B, C and D). The strongest growth inhibition of *pskr1-3 pskr2-*  
286 *1* seedlings compared to wild type was observed at low concentrations of 25 mM and 50  
287 mM mannitol suggesting that PSKR signaling maintains shoot growth particularly well  
288 during mild osmotic stress. Growth reduction induced by mannitol was largely due to  
289 reduced leaf size (Fig. 1B). To see if cell expansion was dependent on PSK signaling  
290 under mannitol stress as reported for unstressed conditions (Matsubayashi *et al.*, 2006;  
291 Kutschmar *et al.*, 2009; Stührwohldt *et al.*, 2011; Ladwig *et al.*, 2015) we analyzed  
292 epidermal cell sizes of wild type and *pskr1-3 pskr2-1* first true leaves (Fig. 1E and F). The  
293 average epidermal cell size was smaller in *pskr1-3 pskr2-1* compared to wild type at  
294 control conditions (Fig. 1E, F). When exposed to 50 mM mannitol, cells became even  
295 smaller in both genotypes with a more severe effect observed in *pskr1-3 pskr2-1* seedlings  
296 indicating that PSK receptor signaling promotes cell expansion under osmotic stress  
297 conditions but cannot fully overcome the stress. As of note, reduction in cell size went  
298 along with reduced lobing of the epidermal cells under mannitol (Fig. 1E). The osmotic  
299 compound sorbitol that was used for comparison also exacerbated growth inhibition in  
300 *pskr1-3 pskr2-1* seedlings compared to wild type in a dose-dependent manner  
301 (Supplemental Fig. S1). Primary root growth was inhibited at 200 mM mannitol in both  
302 genotypes with a significantly stronger inhibition in *pskr1-3 pskr2-1* than wild type  
303 confirming previously reported results (Stührwohldt *et al.*, 2021) whereas root elongation  
304 was unaffected by mannitol up to 100 mM in both genotypes (Supplemental Fig. S2)  
305 indicating that PSKR signaling was important to maintain shoot at mild osmotic stress  
306 conditions.

307 To pinpoint which of the two PSK receptors mediated resistance to osmotic stress-  
308 induced growth inhibition of the shoot, we used single PSK receptor gene knock out lines  
309 (Kutschmar *et al.*, 2009). Growth inhibition by 50 mM mannitol was comparable in the  
310 single knockout line *pskr1-3* and the double knockout line *pskr1-3 pskr2-1* whereas *pskr2-*

311 1 plants showed wild-type shoot growth indicating that PSKR1 promotes growth of plant  
312 shoots exposed to mild osmotic stress (Fig. 2).

313 For shoot growth experiments, we grew seedlings for 4 days on medium without  
314 osmoticum prior to osmotic stress treatment. However, osmotic stress resistance may  
315 also be important at earlier developmental stages during germination. To close this  
316 knowledge gap, we investigated seed germination and cotyledon greening in wild type  
317 and *pskr1-3 pskr2-1* exposed to mannitol, PSK and ABA. ABA is known as a drought  
318 hormone and mediates osmotic stress responses (Zhao *et al.*, 2018). While seed  
319 germination was delayed by ABA and mannitol, no significant differences in germination  
320 rate were observed between wild type and *pskr1-3 pskr2-1* at any of the treatments  
321 indicating that inhibition of seed germination by ABA or mannitol was not controlled by  
322 PSK/PSKR signaling (Supplemental Figs. S3 and S4). On the other hand, cotyledon  
323 greening that is known to be delayed under unfavourable conditions such as under ABA  
324 or mannitol (Guan *et al.*, 2014) was delayed in wild type but not *pskr1-3 pskr2-1* seedlings  
325 (Supplemental Figs. S5 and S6) suggesting that PSK/PSKR signaling contributes to  
326 stress acclimation during very early seedling development. Application of mannitol to four-  
327 day-old seedlings was hence a useful approach to circumvent these early developmental  
328 processes when studying shoot growth regulation.

329  
330 **PSKR signaling in the root is not required for osmotic stress signaling to the shoot**

331  
332 Water deficit is perceived in roots and the stress signal is transmitted to the shoot via the  
333 vasculature (Takahashi and Shinozaki, 2019; Takahashi *et al.*, 2020). We next clarified  
334 whether PSKR signaling was required for stress perception in the root or for a root-derived  
335 stress signal in the shoot. Osmotic stress was routinely applied by transferring seedlings  
336 to plates containing mannitol. In order to test whether PSKR signaling of growth was  
337 induced through direct contact of leaves with mannitol or as part of the water deficit  
338 response signaled by roots, we compared growth on plates where the whole seedling had  
339 access to media to growth on plates where only roots were in contact with media (Fig. 3A,  
340 B). Stronger inhibition of shoot growth was observed in *pskr1-3 pskr2-1* compared to wild  
341 type in both setups but shoots that were not in contact with media began to dry out after  
342 eight days (Fig. 3A and B). To overcome this problem, a hydroponic system was

343 established (Fig. 3C) where seedlings were grown on a mesh separating the shoot from  
344 the medium. After 10 days, seedlings were transferred to media containing 50 mM  
345 mannitol and grown for another 14 days. Shoot growth of *pskr1-3 pskr2-1* seedlings was  
346 significantly impaired compared to wild type (Fig. 3D-F) indicating that osmotic stress  
347 sensed by the roots led to PSKR-dependent shoot growth promotion.

348 To find out if PSKR signaling was required for osmotic stress perception in roots  
349 and participated to signal water deficit to the shoot, we performed grafting experiments as  
350 a widely used technique to investigate long-distance signaling in plants (Corbesier *et al.*,  
351 2007; Chen *et al.*, 2006; Molnar *et al.*, 2010; Liang *et al.*, 2012). Wild type and *pskr1-3*  
352 *pskr2-1* shoot scions and root stocks were grafted as indicated schematically in Figure  
353 4A. Cotyledons were removed before grafting to prevent formation of adventitious roots  
354 which lower grafting efficiency. Ungrafted seedlings, also with cotyledons removed for  
355 better comparison, and within-genotype self-grafts were included as controls. Grafted wild  
356 type and *pskr1-3 pskr2-1* seedlings showed the same growth phenotypes as ungrafted  
357 seedlings indicating that the setup worked properly (Fig. 4C-E). Seedlings with a wild type  
358 shoot and a *pskr1-3 pskr2-1* root had the same shoot growth phenotype as wild type  
359 seedlings at control and stress conditions whereas seedlings with a *pskr1-3 pskr2-1* shoot  
360 and a wild type root had a *pskr1-3 pskr2-1* phenotype (Fig. 4C-E). These observations  
361 indicated that PSKR signaling does not contribute to root-shoot communication of osmotic  
362 stress but is required for growth promotion in the shoot during the stress. Excision of  
363 cotyledons inhibited shoot growth of *pskr1-3 pskr2-1* but not wild type seedlings even in  
364 the absence of osmotic stress (compare Fig. 1A, C and Fig. 4A, E) suggestive of a  
365 crosstalk between cotyledons and true leaves that is dependent on PSKR signaling.  
366 Taken together, the results showed that PSKR acts downstream of a mobile root-derived  
367 signal in the shoot to maintain growth under osmotic stress.

368 To confirm that the PSKR-dependent maintenance of shoot growth under mild  
369 mannitol stress was a response to low water potential, we exposed wild type and *pskr1-3*  
370 *pskr2-1* seedlings to mild drought stress (Fig. 5A). Plants were grown for 3 weeks under  
371 well-watered conditions and subsequently watered with one tenth the water supplied  
372 before. Shoot fresh weight after 3 weeks of growth under water-limiting conditions was  
373 reduced by about 50% in *pskr1-3 pskr2-1* seedlings compared to wild type (Fig. 5B).  
374 Enhanced drought symptoms in the knock-out mutant were further revealed by reduced

375 photosynthetic efficiency of PSII (Fig. 5C, D). Using IMAGING-PAM, two parameters in  
376 dark-adapted and steady-state light conditions,  $F_v/F_m$  and  $\Delta F/F_m'$ , were measured that  
377 reveal a response to abiotic stress (Zhang and Sharkey 2009; Kalaji *et al.*, 2016), including  
378 drought (Yao *et al.*, 2018). From the false colour images (Fig. 5C) the average  $F_v/F_m$  and  
379  $\Delta F/F_m'$  ratios of rosettes were determined in both genotypes under control and drought  
380 conditions. The  $F_v/F_m$  ratio was close to 0.8 in both genotypes in well-watered conditions  
381 and decreased more under drought in *pskr1-3 pskr2-1* than wild type (Fig. 5D). The  
382  $\Delta F/F_m'$  ration indicates steady-state quantum yield of PSII in light-adapted conditions and  
383 is an accurate indicator of operational PSII efficiency (Murchie and Lawson 2013). This  
384 ratio was also significantly lower in drought-exposed *pskr1-3 pskr2-1* plants compared to  
385 wild type (Fig. 5E) revealing that plants lacking PSKR signaling are more sensitive to low  
386 water potential.

387

### 388 **Osmotic stress and ABA promote expression of *PSKR* and *PSK* genes**

389

390 We next analyzed expression of *PSK* and *PSKR* genes in response to mannitol and ABA  
391 as a drought stress-induced hormone. *Promoter:GUS* lines (Kutschmar *et al.*, 2009;  
392 Stührwohldt *et al.*, 2011) were used to obtain spatial resolution and microarray and qRT-  
393 PCR data were used to quantify changes in gene expression. *PSKR1:GUS* activity was  
394 detected in cotyledons, true leaves and in the root and appeared to be induced in true  
395 leaves by mannitol (Fig. 6A-F). Microarray data showed induction of *PSKR1* in shoots  
396 after 1 day of treatment with 300 mM mannitol (Fig. 6H). RT-qPCR data confirmed  
397 elevated *PSKR1* transcript levels in true leaves after 1 day of exposure to 50 mM or 200  
398 mM mannitol as well as by 1  $\mu$ M and 5  $\mu$ M ABA (Fig. 6I). By contrast, *PSKR2:GUS* activity  
399 was present in the cotyledon hydathode region (Fig. 6G) and *PSKR2* was induced in true  
400 leaves at 200 mM mannitol and 5  $\mu$ M ABA but not at lower concentrations (Fig. 6J) in  
401 accord with the finding that shoot growth promotion under mild osmotic stress was  
402 dependent on *PSKR1* (Fig. 2).

403 Of the five PSK precursor genes, *PSK2*, *PSK3*, *PSK4* and *PSK5* but not *PSK1* were  
404 expressed in the shoot in accord with the previous finding that *PSK1* is root-specific  
405 (Kutschmar *et al.*, 2009) (Fig. 7A). *PSK3:GUS* activity was particularly high in young,  
406 expanding leaves. Analysis of PSK precursor gene expression by RT-qPCR showed

407 significant induction of *PSK3* by 200 mM mannitol and 5  $\mu$ M ABA in wild type while *PSK2*  
408 and *PSK4* expression was induced by ABA (Fig. 7B-F). Knockout of PSK signaling in  
409 *pskr1-3 pskr2-1* resulted in elevated *PSK2* and *PSK4* expression at control conditions  
410 suggestive of feedback inhibition by PSKR signaling. Mannitol but not ABA resulted in  
411 hyperinduced *PSK1*, *PSK2*, *PSK3* and *PSK5* transcript levels in *pskr1-3 pskr2-1*  
412 compared to wild type. Taken together, the data revealed common and differential  
413 induction of PSK genes in response to mannitol and ABA and a negative feedback loop  
414 between PSKR signaling and *PSK* expression.

415

### 416 **PSKR signaling regulates ABA levels and ABA responsiveness**

417

418 Responses to osmotic stress are regulated by ABA-dependent and ABA-independent  
419 pathways. *PSK3* and *PSKR1* were regulated by both, mannitol and ABA suggesting that  
420 PSK/PSKR-ABA crosstalk occurs under osmotic stress. Since ABA is predominantly  
421 synthesized in leaves upon drought (Cardoso *et al.*, 2020) we asked whether ABA levels  
422 were regulated by PSKR signaling. Analysis of ABA levels in wild type seedling shoots by  
423 mass spectrometry revealed a dose-dependent increase in ABA in response to mannitol  
424 (Fig. 8A). A similar increase was observed in roots (Supplemental Fig. S7). By contrast,  
425 ABA levels did not increase in *pskr1-3 pskr2-1* shoots in response to mannitol whereas in  
426 roots, ABA levels increased in *pskr1-3 pskr2-1* seedlings at 200 mM mannitol albeit overall  
427 levels were lower than in wild type (Supplemental Fig. S7). To verify a PSKR-dependent  
428 ABA accumulation in the shoot, we introduced the ABA sensor ABAleon2.1 (Waadt *et al.*  
429 2014) into the *pskr1-3 pskr2-1* background. Photobleaching-based FRET analysis  
430 (Supplemental Fig. S8) revealed a decreased FRET efficiency, reporting elevated ABA in  
431 wild type but not in *pskr1-3 pskr2-1* in response to mannitol (Fig. 8B). The difference in  
432 absolute FRET efficiency between genotypes may be owed to the fact that the lines were  
433 transformed rather than introgressed.

434 NCED3 is an ABA-biosynthetic enzyme that is upregulated in water-stressed leaves  
435 (Iuchi *et al.*, 2001; Endo *et al.*, 2008). We analyzed expression of *NCED3*, *NCED5* and  
436 *NCED9*, but found no significant differences in shoots of wild type and *pskr1-3 pskr2-1*  
437 seedlings exposed to mannitol (Supplemental Fig. S9). We next analyzed AAO gene  
438 expression. AAO enzymes catalyze the conversion of abscisic aldehyde to ABA. *AAO1*



439 transcript levels were significantly higher in *pskr1-3 pskr2-1* than wild type and were  
440 upregulated in both genotypes by mannitol to the same level (Fig. 8C). By contrast, *AAO2*  
441 was upregulated significantly by mannitol in wild type but not *pskr1-3 pskr2-1* (Fig. 8D)  
442 which may contribute to the lower ABA level observed under osmotic stress.

443 Apart from synthesis, ABA levels depend on transient in-/activation and on  
444 degradation. ABA is inactivated to ABA-glucosyl ester (ABA-GE) by glycosyl transferases  
445 UGT71B6-B8 (Priest *et al.*, 2006) (Supplemental Figure S9A). Of these, UGT71B6 is  
446 induced by mannitol in wild type and hyperinduced by mannitol in *pskr1-3 pskr2-1*,  
447 suggesting that loss of PSKR signaling favors ABA inactivation under mannitol stress. No  
448 genotype-dependent differences were observed in response to ABA. Release of ABA from  
449 ABA-GE is catalyzed by two ABA glucosidases, BG1 and BG2 (Xu *et al.*, 2012).  
450 Transcripts of *BG1* were induced by ABA but not mannitol whereas *BG2* was not  
451 regulated. No differences in response to mannitol or ABA were observed between wild  
452 type and *pskr1-3 pskr2-1* (Supplemental Figure S10). *CYP707A1-4* genes code for ABA  
453 8'-hydroxylases that degrade ABA to phaseic acid (Kushiro *et al.*, 2004; Saito *et al.*, 2004;  
454 Okamoto *et al.*, 2006). *CYP707A1* transcript levels were higher in *pskr1-3 pskr2-1* than in  
455 wild type exposed to mannitol possibly indicating enhanced ABA degradation in the  
456 mutant under osmotic stress (Supplemental Figure S11). In conclusion, the findings  
457 revealed crosstalk between PSKR signaling and ABA metabolism and suggest that PSKR  
458 signaling promotes expression of genes that favor ABA accumulation. These observations  
459 are in accord with the finding that PSKR signaling is needed to enhance ABA levels in  
460 response to mannitol.

461 We next explored whether the inability of *pskr1-3 pskr2-1* seedling shoots to  
462 accumulate ABA under osmotic stress could be complemented by exogenous ABA. A  
463 dose-response analysis showed that ABA at 0.1  $\mu\text{M}$  and higher inhibited shoot growth in  
464 wild type under control conditions whereas *pskr1-3 pskr2-1* seedling growth was inhibited  
465 at 0.3  $\mu\text{M}$  ABA and higher (Fig. 9A, B, C and D). In the presence of mannitol, shoot growth  
466 was promoted at 0.01  $\mu\text{M}$  ABA in wild type and at 0.1 and 1  $\mu\text{M}$  ABA in *pskr1-3 pskr2-1*  
467 seedlings indicating that low levels of ABA promote shoot growth under osmotic stress.  
468 The need for higher ABA required to promote shoot growth in *pskr1-3 pskr2-1* seedlings  
469 may be explained by a lower endogenous ABA content fostering the idea that PSKR  
470 promotes growth in part by increasing ABA in response to mannitol. It should be noted,



471 however, that growth inhibition by mannitol was only partially alleviated by ABA in *pskr1-*  
472 *3 pskr2-1* suggesting that other levels of regulation exist.

473 Finally, we analyzed a possible interaction between PSKR signaling and ABA  
474 signaling by using two marker genes of ABA signaling, *ABA-INSENSITIVE 1 (ABI1)* and  
475 *ABI2*, that act as negative regulators of ABA signaling and have been implicated in stress  
476 acclimation (Ludwików, 2015). Under mannitol, *pskr1-3 pskr2-1* seedlings accumulated  
477 higher *ABI1* and *ABI2* transcript levels than wild type whereas no difference was observed  
478 at unstressed conditions (Fig. 9E, F) indicating that ABA signaling under osmotic stress  
479 may be repressed in *pskr1-3 pskr2-1*. In conclusion, several lines of evidence suggest a  
480 role for PSKR signaling in plant acclimation to osmotic stress through crosstalk with ABA  
481 metabolism and signaling at the transcriptional level (Figure 10).

482

483

484

## 485 **DISCUSSION**

486

487 **PSK receptor signaling mediates osmotic stress-induced inhibition of cotyledon**  
488 **development.**

489

490 Seed germination and seedling establishment are stringently controlled by environmental  
491 conditions to ensure seedling survival. In particular, water availability is a requirement for  
492 seedling establishment. Under water-limited conditions, ABA acts as a hormonal signal  
493 that prevents germination and inhibits seedling growth. PSK signaling was previously  
494 shown to promote organ growth through cell expansion (Kutschmar *et al.*, 2009; Hartmann  
495 *et al.*, 2013). Under osmotic stress imposed by mannitol treatment, PSK receptor signaling  
496 inhibited postgermination seedling development while the PSK receptor null mutant *pskr1-*  
497 *3 pskr2-1* showed enhanced cotyledon greening and seedling growth. Seedling  
498 development is likewise inhibited by ABA. Both, mannitol and ABA-dependent inhibition  
499 were, to a large part, dependent on PSKR signaling. More so, seedlings overexpressing  
500 PSKR1 were hypersensitive to ABA and to mannitol suggesting that PSKRs mediate  
501 growth adaptation in response to osmotic stress. Inhibition of cotyledon greening by  
502 PSKR signaling is a novel finding as PSKRs were previously described as growth-

503 promoting receptors. The current observation thus extends our view on growth regulation  
504 by PSKRs and reveals that PSKR signaling inhibits early seedling growth under  
505 unfavorable environmental conditions. By contrast, postgermination shoot growth under  
506 water-limiting conditions was promoted by *PSKR1*. PSKR-dependent inhibition of growth  
507 at the early seedling stage and promotion of postgermination shoot growth under water-  
508 limiting conditions suggests that developmental arrest of seedlings and maintenance of  
509 vegetative growth of plants are best choices to cope with water shortage and that PSKR  
510 signaling can be wired accordingly.

511

### 512 **PSKRs support shoot growth during osmotic stress**

513

514 A recent report showed that PSK precursor processing via SBT3.8 subtilase improves  
515 root growth and drought stress resistance in *Arabidopsis* (Stührwohldt *et al.*, 2021).  
516 Drought stress experiments described here revealed that *PSKR* signaling is required to  
517 maintain postgermination shoot growth, and photosynthetic efficiency to counteract  
518 drought-induced senescence. It was previously reported that *PSKR1* delays senescence  
519 after bolting and provides cellular longevity and potential for growth (Matsubayashi *et al.*,  
520 2006). This ability appears particularly important during water limiting conditions. A crucial  
521 role of *PSKR1* in promoting osmotic stress resistance of the shoot was revealed in single  
522 receptor gene knockout lines. *pskr1-3* seedlings displayed the same growth retardation  
523 as seedlings of the double receptor knock out line *pskr1-3 pskr2-1* whereas *pskr2-1*  
524 seedlings had a wild type phenotype.

525 Grafting experiments and osmotic stress application to the root showed that shoot  
526 growth requires PSKR signaling in the leaves likely induced by a long-distance stress  
527 signal transmitted from the roots via the vasculature (Takahashi and Shinozaki, 2019;  
528 Takahashi *et al.*, 2020). Whether the peptide PSK participates in long distance signaling  
529 cannot be excluded but, clearly, PSKR signaling is neither required for signal synthesis in  
530 the root nor for the transmission of the signal from root to shoot. In the leaves, cells  
531 communicate via the extracellular signal PSK and the plasma membrane-bound PSKR1  
532 receptor despite of a continuous network of plasmodesmata that enable cell-cell  
533 communication. It has been suggested that apoplastic signals allow for signal integration

534 and output coordination (Chivasa and Goodman, 2020). In that light, PSK/PSKR1  
535 signaling appears highly suitable to coordinate leaf growth.

536 Plants adjust shoot and root growth to limited soil water availability with different  
537 sensitivities dependent on the degree and duration of the stress (Deak and Malamy, 2005;  
538 Comas *et al.*, 2013; Pierik and Testerink, 2014; Koevoets *et al.*, 2016). Root growth was  
539 inhibited at 200 mM mannitol and higher (this study; Stührwohldt *et al.*, 2021) whereas  
540 shoot growth was reduced already at 25 mM mannitol supporting the finding that shoot  
541 growth is more sensitive to the stress (Claeys *et al.*, 2014). In accord with a well-adjusted  
542 stress management, shoot growth maintenance via PSKR1 signaling was most efficient  
543 at low mannitol concentrations providing particularly good protection against mild water  
544 stress to the highly sensitive shoot.

545  
546 **PSK precursor and receptor genes are induced in the shoot by mannitol and ABA**  
547 **to promote growth**

548  
549 Plant shoots exposed to mannitol displayed elevated transcript levels of *PSKR1* and of  
550 the PSK precursor gene *PSK3*, that were also induced by ABA suggesting that the PSK  
551 signal pathway is promoted by osmotic stress signaling through ABA to actively maintain  
552 shoot growth. Mannitol and ABA exerted common but also differential control of PSK  
553 signaling genes pointing to a fine-tuned regulatory network rather than a linear pathway  
554 of growth control. *PSK2* and *PSK4* were induced by ABA but not by mannitol revealing  
555 ABA regulation of PSK signaling in a pathway that is unrelated to mannitol-induced  
556 osmotic stress. Intricate regulatory loops were revealed by hyperinduction of *PSK1*, *PSK3*  
557 and *PSK5* by mannitol in the PSK receptor null background compared to wild type which  
558 suggested that PSK signaling feedback-inhibits expression of ligand precursor genes  
559 under osmotic stress possibly to balance growth under water-limited conditions. The  
560 regulated signaling genes *PSK3* and *PSKR1* were expressed most prominently in young  
561 expanding leaves in accord with their role in driving cell expansion (Hartmann *et al.*, 2013;  
562 Ladwig *et al.*, 2015).

563  
564 **ABA homeostasis in osmotically stressed leaves is controlled by PSKR signaling**

565

566 Mannitol-induced osmotic stress led to an increase of ABA in leaves. The elevation of  
567 ABA levels was dependent on PSKR signaling raising the question how PSK signaling  
568 controls ABA homeostasis at the molecular level. The steady-state level of active ABA is  
569 determined by ABA synthesis, catabolism, inactivation and remobilization (Cutler and  
570 Krochko, 1999; Nambara and Marion-Poll, 2005). NCEDs are key enzymes of ABA  
571 synthesis that cleave 9-*cis*-xanthophylls to xanthoxin, a precursor of ABA. Arabidopsis  
572 NCED3 was previously described as the major stress-induced *NCED* gene in leaves with  
573 *NCED5* and *NCED9* being induced to a minor degree in response to water-deficit (Tan *et*  
574 *al.*, 2003). In our study, *NCED3* was induced by mannitol in wild type and hyperinduced  
575 in the *PSKR* null mutant whereas *NCED5* was induced by ABA which favors elevated ABA  
576 synthesis in drought-stressed shoots in both genotypes. The final step in ABA synthesis  
577 is catalyzed by AAO that is encoded by two genes in Arabidopsis, *AAO1* and *AO2* (Seo  
578 *et al.*, 2000). *AAO1* was induced by mannitol in wild type and *pskr1-3 pskr2-1* shoots,  
579 whereas *AAO2* was induced in wild type but not *pskr1-3 pskr2-1* indicating that at least  
580 some of the capacity to synthesize ABA in response to osmotic stress is controlled by  
581 *PSKR*s. Similarly, *pskr1-3 pskr2-1* shoots showed hyperinduction of the ABA-conjugating  
582 gene *UGT71B6* and downregulation of the ABA-glucose  $\beta$ -glucosidase gene *BG1* in  
583 shoots when exposed to mannitol. BGs were previously described as key regulators of  
584 osmotic stress resistance (Xu *et al.*, 2012). *BG1* is regulated by miR165/166 and  
585 downregulation of miR165/166 resulted in elevated *BG1* expression and in elevated ABA  
586 levels (Yan *et al.*, 2016). Taken together, the data show that PSKR signaling impacts  
587 expression of genes related to ABA metabolism in response to mannitol. The changes in  
588 gene expression suggest that ABA synthesis and release from ABA-glucose may be  
589 reduced in the PSK receptor null mutant whereas conjugation of ABA may be favored.  
590 This would explain why ABA levels do not increase in osmotically stressed *pskr1-3 pskr2-*  
591 *1* shoots.

592 In addition to ABA synthesis, ABA signaling may be controlled by *PSKR*s. ABA is  
593 perceived by Pyrabactin Resistant/Pyrabactin Resistant-Like/Regulatory Components of  
594 ABA Receptor (PYR/PYL/RCAR) receptors. The protein phosphatases 2C (PP2Cs) ABI1  
595 and ABI2 act as PYR/PYL/RCAR-coreceptors that keep downstream SnRK2s in an  
596 inactive state in the absence of ABA (Joshi-Saha *et al.*, 2011; Mitula *et al.*, 2015). When  
597 PYR/PYL/RCAR receptors bind ABA, the PP2Cs are inactivated leading to the activation

598 of SnRKs that are critical for osmotic stress responses (Boudsocq *et al.*, 2004; Fujii *et al.*,  
599 2011). Expression analysis revealed higher transcript levels of the negative ABA regulator  
600 genes *ABI1* and *ABI2* in *pskr1-3 pskr2-1* compared to wild type following mannitol  
601 treatment suggesting that *PSKR*s promotes not only synthesis but also ABA signaling  
602 during osmotic stress.

603 A particular role of ABA in growth maintenance under water stress conditions was  
604 revealed by exogenous ABA. In wild type, ABA promoted shoot growth at 0.01  $\mu$ M  
605 whereas the growth-promoting concentrations were shifted to 0.1-1  $\mu$ M ABA in *pskr1-3*  
606 *pskr2-1* seedlings. A requirement for a higher concentration of ABA in need to promote  
607 growth is in accord with lower endogenous ABA levels in the mutant. The relative growth  
608 promoting effect of ABA under mannitol stress was higher in the mutant than in wild type  
609 but ABA did not fully restore the dwarf phenotype of the mutant at any concentration  
610 indicating that additional pathways are misregulated in *pskr1-3 pskr2-1* seedlings that  
611 ensure growth under water-limiting conditions.

612 In summary, PSKR signaling controls adaptation of the shoot to drought stress by  
613 maintaining growth under water-limiting conditions and by maintaining photosynthetic  
614 activity. PSKR signaling is not required for long-distance signaling of osmotic stress from  
615 the root to the shoot but rather promotes ABA levels and possibly ABA signaling in the  
616 shoot. Our study reveals a role of PSKR signaling in balancing shoot growth and water-  
617 stress responses.

618

619

## 620 **SUPPLEMENTARY DATA**

621

622 Table S1. Primer sequences used for qRT-PCR.

623 Fig. S1. PSKRs confer enhanced resistance to sorbitol.

624 Fig. S2. PSK receptor signaling is required to maintain root growth under severe osmotic  
625 stress.

626 Fig. S3. Inhibition of seed germination by mannitol is not dependent on PSK receptor  
627 signaling.

628 Fig. S4. Inhibition of seed germination by ABA is not dependent on PSK receptor signaling.

629 Fig. S5. Repression of early seedling development by ABA or mannitol is mediated by  
630 PSK receptor signaling.

631 Fig. S6. Inhibition of cotyledon greening by ABA is partially dependent on PSKR signaling.

632 Fig. S7. ABA accumulation under mannitol stress in roots.

633 FIG. S8. Differences in ABA concentration were measured using the FRET-based ABA  
634 sensor ABAleon.

635 FIG. S9. Regulation of *NCED* expression by mannitol and ABA.

636 FIG. S10. Regulation of *UGT71B* and *BG* transcripts by mannitol, ABA and PSKR  
637 signaling.

638 FIG. S11. Regulation of *CYP707A* ABA-8'-hydroxylase transcripts by mannitol, ABA and  
639 PSKR signaling.

640

641

## 642 **ACKNOWLEDGEMENTS**

643

644 Hagen Stellmach (IPB Halle) is acknowledged for helping in ABA measurements and Prof.  
645 Wolfgang Bilger (University of Kiel) for help with PAM imaging. We are grateful to Rainer  
646 Waadt and Karin Schumacher (University Heidelberg) for providing the *ABALEON2.1* line  
647 and the plasmid *barII-UT-ABALEON2.1*. This work was funded by the Deutsche  
648 Forschungsgemeinschaft through grants SA495/8-1 and SA495/8-2.

649

650

## 651 **AUTHOR CONTRIBUTIONS**

652

653 MS conceived the project. MS, KR and MDS designed the experiments. BH performed  
654 ABA measurements and data analysis. KR and MDS performed experiments and  
655 analyzed data. MS wrote the manuscript with contributions from KR, MDS and BH.

656

657

## 658 **DATA AVAILABILITY STATEMENT**

659

660 All data supporting the findings of this study are available within the paper and within its  
661 supplementary data published online.

662

663



664 **REFERENCES**

- 665
- 666 **Amano Y, Tsubouchi H, Shinohara H, Ogawa M, Matsubayashi Y.** 2007. Tyrosine-  
667 sulfated glycopeptide involved in cellular proliferation and expansion in Arabidopsis.  
668 Proceedings of the National Academy of Sciences, USA 104, 18333-18338.
- 669 **Bartels D, Sunkar R.** 2005. Drought and Salt Tolerance in Plants. Critical Reviews in  
670 Plant Sciences 24, 23-58.
- 671 **Balcke G, Handrick V, Bergau N, Fichtner M, Henning A, Stellmach H, Tissier A,**  
672 **Hause B, Frolov A.** 2012. An UPLC-MS/MS method for highly sensitive high-throughput  
673 analysis of phytohormones in plant tissues. Plant Methods 8, 47.
- 674 **Boudsocq M, Barbier-Brygoo H, Laurière C.** 2004. Identification of nine sucrose  
675 nonfermenting 1-related protein kinases 2 activated by hyperosmotic and saline stresses  
676 in Arabidopsis thaliana. The Journal of Biological Chemistry 279, 41758-41766.
- 677 **Cardoso AA, Brodribb TJ, Kane CN, DaMatta FM, McAdam SAM.** 2020. Osmotic  
678 adjustment and hormonal regulation of stomatal responses to vapour pressure deficit in  
679 sunflower. Annals of Botany Plants 12, plaa025.
- 680 **Chen A, Komives EA, Schroeder JI.** 2006. An improved grafting technique for mature  
681 Arabidopsis plants demonstrates long-distance shoot-to-root transport of phytochelatin  
682 in Arabidopsis. Plant Physiology 141,108-120.
- 683 **Chivasa S, Goodman HL.** 2020. Stress-adaptive gene discovery by exploiting collective  
684 decision-making of decentralized plant response systems. The New Phytologist 225,  
685 2307-2313.
- 686 **Claeys H, Van Landeghem S, Dubois M, Maleux K, Inzé D.** 2014. What Is Stress?  
687 Dose-Response Effects in Commonly Used in Vitro Stress Assays. Plant Physiology  
688 1652, 519-527.
- 689 **Clough SJ, Bent AF.** 1998. Floral dip: a simplified method for Agrobacterium-mediated  
690 transformation of Arabidopsis thaliana. The Plant journal: for cell and molecular biology  
691 16, 735-743.
- 692 **Comas LH, Becker SR, Cruz VM, Byrne PF, Dierig DA.** 2013. Root traits contributing to  
693 plant productivity under drought. Frontiers in plant science 4, 442.

- 694 **Corbesier L, Vincent C, Jang S, Fornara F, Fan Q, Searle I, Giakountis A, Farrona S,**  
695 **Gissot L, Turnbull C, Coupland G.** 2007. FT protein movement contributes to long-  
696 distance signaling in floral induction of Arabidopsis. *Science* 316, 1030-1033.
- 697 **Cutler AJ, Krochko JE.** 1999. Formation and breakdown of ABA. *Trends in Plant Science*  
698 4, 472-478.
- 699 **Deak KI, Malamy J.** 2005. Osmotic regulation of root system architecture. *The Plant*  
700 *journal: for cell and molecular biology* 43, 17-28.
- 701 **Dejonghe W, Okamoto M, Cutler SR.** 2018. Small molecule probes of ABA biosynthesis  
702 and signaling. *Plant Cell Physiology* 59, 1490-1499.
- 703 **Dong T, Xu ZY, Park Y, Kim DH, Lee Y, Hwang I.** 2014. Abscisic acid uridine  
704 diphosphate glucosyltransferases play a crucial role in abscisic acid homeostasis in  
705 Arabidopsis. *Plant Physiology* 165, 277-289.
- 706 **Endo A, Sawada Y, Takahashi H, et al.** 2008. Drought induction of Arabidopsis 9-cis-  
707 epoxy-carotenoid dioxygenase occurs in vascular parenchyma cells. *Plant Physiology* 147,  
708 1984-1993.
- 709 **Finkelstein R.** 2013. Abscisic acid synthesis and response. *Arabidopsis Book*, 11:e0166  
710 <http://dx.doi.org/10.1199/tab.0166>.
- 711 **Fujii H, Verslues PE, Zhu JK.** 2011. Arabidopsis decuple mutant reveals the importance  
712 of SnRK2 kinases in osmotic stress responses in vivo. *Proceedings of the National*  
713 *Academy of Sciences U S A*, 108, 1717-1722.
- 714 **Guan C, Wang X, Feng J, Hong S, Liang Y, Ren B, Zuo J.** 2014. Cytokinin antagonizes  
715 abscisic acid-mediated inhibition of cotyledon greening by promoting the degradation of  
716 abscisic acid insensitive5 protein in Arabidopsis. *Plant Physiology* 164, 1515-1526.
- 717 **Hartmann J, Stührwohldt N, Dahlke RI, Sauter M.** 2013. Phytosulfokine control of  
718 growth occurs in the epidermis, is likely to be non-cell autonomous and is dependent on  
719 brassinosteroids. *Plant Journal* 73, 579-590.
- 720 **Hartmann J, Linke D, Bönninger C, Tholey A, Sauter M.** 2015. Conserved  
721 phosphorylation sites in the activation loop of the Arabidopsis phytosulfokine receptor  
722 PSKR1 differentially affect kinase and receptor activity. *The Biochemical Journal* 472,  
723 379-391.
- 724 **Joshi-Saha A, Valon C, Leung J.** 2011. Abscisic acid signal off the STARting block.  
725 *Molecular Plant* 4, 562-580.

726 **Kalaji HM, Jajoo A, Oukarroum A, Brestic M, Zivcak M, Samborska IA, Cetner MD,**  
727 **Lukasik I, Goltsev V, Ladle RJ.** 2016. Chlorophyll a fluorescence as a tool to monitor  
728 physiological status of plants under abiotic stress conditions. *Acta Physiol Plant* 38, 102.  
729 **Kalve S, Sizani BL, Markakis MN, et al.** 2020. Osmotic stress inhibits leaf growth of  
730 *Arabidopsis thaliana* by enhancing ARF-mediated auxin responses. *The New Phytologist*  
731 226, 1766-1780.  
732 **Kaufmann C, Sauter M.** 2019. Sulfated plant peptide hormones. *Journal of Experimental*  
733 *Botany* 70, 4267-4277.  
734 **Koevoets IT, Venema JH, Elzenga JT, Testerink C.** 2016. Roots Withstanding their  
735 Environment: Exploiting Root System Architecture Responses to Abiotic Stress to  
736 Improve Crop Tolerance. *Frontiers in Plant Science* 7,1335.  
737 **Kushiro T, Okamoto M, Nakabayashi K, Yamagishi K, Kitamura S, Asami T, Hirai N,**  
738 **Koshiba T, Kamiya Y, Nambara E.** 2004. The *Arabidopsis* cytochrome P450 CYP707A  
739 encodes ABA 8'-hydroxylases: key enzymes in ABA catabolism. *The EMBO Journal* 23,  
740 1647-1656.  
741 **Kutschmar A, Rzewuski G, Stührwohldt N, Beemster GTS, Inzé D, Sauter M.** 2009.  
742 PSK- $\alpha$  promotes root growth in *Arabidopsis*. *The New Phytologist* 181, 820-831.  
743 **Ladwig F, Dahlke RI, Stührwohldt N, Hartmann J, Harter K, Sauter M.** 2015.  
744 Phytosulfokine Regulates Growth in *Arabidopsis* through a Response Module at the  
745 Plasma Membrane That Includes CYCLIC NUCLEOTIDE-GATED CHANNEL17, H<sup>+</sup>-  
746 ATPase, and BAK1. *The Plant Cell* 27, 1718-1729.  
747 **Lee KH, Piao HL, Kim HY, Choi SM, Jiang F, Hartung W, et al.** 2006. Activation of  
748 glucosidase via stress-induced polymerization rapidly increases active pools of abscisic  
749 acid. *Cell* 126, 1109–1120.  
750 **Liang D, White RG, Waterhouse PM.** 2012. Gene silencing in *Arabidopsis* spreads from  
751 the root to the shoot, through a gating barrier, by template-dependent, nonvascular, cell-  
752 to-cell movement. *Plant physiology*, 159, 984–1000.  
753 **Luchi S, Kobayashi M, Taji T, Naramoto M, Seki M, Kato T, Tabata S, Kakubari Y,**  
754 **Yamaguchi-Shinozaki K, Shinozaki K.** 2001. Regulation of drought tolerance by gene  
755 manipulation of 9-cis-epoxycarotenoid dioxygenase, a key enzyme in abscisic acid  
756 biosynthesis in *Arabidopsis*. *The Plant journal: for cell and molecular biology* 27, 325-333.

- 757 **Ludwików A.** 2015. Targeting proteins for proteasomal degradation-a new function of  
758 Arabidopsis ABI1 protein phosphatase 2C. *Frontiers in plant science*, 6, 310.
- 759 **Marsch-Martínez N, Franken J, Gonzalez-Aguilera KL, de Folter S, Angenent G,**  
760 **Alvarez-Buylla ER.** 2013. An efficient flat-surface collar-free grafting method for  
761 Arabidopsis thaliana seedlings. *Plant Methods* 9, 14.
- 762 **Matsubayashi Y, Ogawa M, Kihara H, Niwa A, Sakagami Y.** 2006. Disruption and  
763 overexpression of Arabidopsis phytosulfokine receptor gene affects cellular longevity and  
764 potential for growth. *Plant Physiology* 142, 45-53.
- 765 **Mitula F, Tajdel M, Cieśla A, Kasprowicz-Maluśki A, Kulik A, Babula-Skowrońska D,**  
766 **Michalak M, Dobrowolska G, Sadowski J, Ludwików A.** 2015. Arabidopsis ABA-  
767 Activated Kinase MAPKKK18 is Regulated by Protein Phosphatase 2C ABI1 and the  
768 Ubiquitin-Proteasome Pathway. *Plant & Cell Physiology* 56, 2351-2367.
- 769 **Molnar A, Melnyk CW, Bassett A, Hardcastle TJ, Dunn R, Baulcombe DC.** 2010.  
770 Small silencing RNAs in plants are mobile and direct epigenetic modification in recipient  
771 cells. *Science* 328, 872-875.
- 772 **Munemasa S, Hauser F, Park J, Waadt R, Brandt B, Schroeder JI.** 2015. Mechanisms  
773 of abscisic acid-mediated control of stomatal aperture. *Current Opinion in Plant Biology*  
774 28,154-162.
- 775 **Murchie EH, Lawson T.** 2013. Chlorophyll fluorescence analysis: a guide to good  
776 practice and understanding some new applications. *Journal of Experimental Botany* 64,  
777 3983-3998.
- 778 **Murashige T, Skoog F.** 1962. A Revised Medium for Rapid Growth and Bioassays with  
779 Tobacco Tissue Cultures. Oxford: Wiley-Blackwell.
- 780 **Nambara E, Marion-Poll A.** 2005. Abscisic acid biosynthesis and catabolism. *Annual*  
781 *Review of Plant Biology* 56,165–185.
- 782 **Nikonorova N, Van den Broeck L, Zhu S, van de Cotte B, Dubois M, Gevaert K, Inzé**  
783 **D, De Smet I.** 2018. Early mannitol-triggered changes in the Arabidopsis leaf  
784 (phospho)proteome reveal growth regulators. *Journal of Experimental Botany* 69, 4591-  
785 4607.
- 786 **Okamoto M, Kuwahara A, Seo M, Kushiro T, Asami T, Hirai N, Kamiya Y, Koshiba T,**  
787 **Nambara E.** 2006. CYP707A1 and CYP707A2, which encode abscisic acid 8'-

788 hydroxylases, are indispensable for proper control of seed dormancy and germination in  
789 *Arabidopsis*. *Plant Physiology* 141, 97-107.

790 **Pfaffl MW**. 2001. A new mathematical model for relative quantification in real-time RT-  
791 PCR. *Nucleic Acids Research* **29**, e45.

792 **Pierik R, Testerink C**. 2014. The art of being flexible: how to escape from shade, salt,  
793 and drought. *Plant Physiology* 166, 5-22.

794 **Priest DM, Ambrose SJ, Vaistij FE, Elias L, Higgins GS, Ross AR, Abrams SR,**  
795 **Bowles DJ**. 2006. Use of the glucosyltransferase UGT71B6 to disturb abscisic acid  
796 homeostasis in *Arabidopsis thaliana*. *The Plant journal: for cell and molecular biology* 46,  
797 492-502.

798 **Saito S, Hirai N, Matsumoto C, Ohigashi H, Ohta D, Sakata K, Mizutani M**. 2004.  
799 *Arabidopsis* CYP707As encode (+)-abscisic acid 8'-hydroxylase, a key enzyme in the  
800 oxidative catabolism of abscisic acid. *Plant Physiology* 134, 1439-1449.

801 **Sauter M**. 2015. Phytosulfokine peptide signalling. *Journal of experimental botany* 66,  
802 5161–5169.

803 **Schwartz SH, Qin X, Zeevaart JAD**. 2003. Elucidation of the indirect pathway of abscisic  
804 acid biosynthesis by mutants, genes, and enzymes. *Plant Physiology* 131, 1591-1601.

805 **Seo M, Koiwai H, Akaba S, Komano T, Oritani T, Kamiya Y, Koshiwa T**. 2000. Abscisic  
806 aldehyde oxidase in leaves of *Arabidopsis thaliana*. *The Plant journal: for cell and*  
807 *molecular biology* 23, 481–488.

808 **Stührwohldt N, Dahlke RI, Steffens B, Johnson A, Sauter M**. 2011. Phytosulfokine- $\alpha$   
809 controls hypocotyl length and cell expansion in *Arabidopsis thaliana* through  
810 phytosulfokine receptor 1. *PLoS ONE* 6, e21054.

811 **Stührwohldt N, Bühler E, Sauter M, Schaller A**. 2021. Phytosulfokine (PSK) precursor  
812 processing by subtilase SBT3.8 and PSK signaling improve drought stress tolerance in  
813 *Arabidopsis*. *Journal of Experimental Botany* 72, 3427–3440.

814 **Takahashi F, Kuromori T, Urano K, Yamaguchi-Shinozaki K, Shinozaki K**. 2020.  
815 Drought stress responses and resistance in plants: From cellular responses to long-  
816 distance intercellular communication. *Frontiers in Plant Science* 11, 556972.

817 **Takahashi F, Shinozaki K**. 2019. Long-distance signaling in plant stress response.  
818 *Current Opinion in Plant Biology* 47, 106–111.

- 819 **Takahashi F, Suzuki T, Osakabe Y, Betsuyaku S, Kondo Y, Dohmae N, et al.** 2018. A  
820 small peptide modulates stomatal control via abscisic acid in long-distance signalling.  
821 *Nature* 556, 235–238.
- 822 **Tan BC, Joseph LM, Deng WT, Liu L, Li QB, Cline K, McCarty DR.** 2003. Molecular  
823 characterization of the Arabidopsis 9-cis epoxy-carotenoid dioxygenase gene family. *The*  
824 *Plant Journal* 35, 44-56.
- 825 **Vandesompele J, De Preter K, Pattyn F, Poppe B, Van Roy N, De Paepe A, Speleman**  
826 **F.** 2002. Accurate normalization of real-time quantitative RT-PCR data by geometric  
827 averaging of multiple internal control genes. *Genome Biology* 3, research0034.1-  
828 research0034.11.
- 829 **Waadt R, Hitomi K, Nishimura N, Hitomi C, Adams SR, Getzoff ED, Schroeder JI.**  
830 2014. FRET-based reporters for the direct visualization of abscisic acid concentration  
831 changes and distribution in Arabidopsis. *Elife* 3, e01739.
- 832 **Weigel D, Glazebrook J.** 2002. *Arabidopsis: A Laboratory Manual*. Cold Spring Harbor  
833 Laboratory Press. ISBN 0 87969 572 2.
- 834 **Xu ZY, Lee KH, Dong T, et al.** 2012. A vacuolar beta-glucosidase homolog that  
835 possesses glucose-conjugated abscisic acid hydrolyzing activity plays an important role  
836 in osmotic stress responses in Arabidopsis. *The Plant Cell* 24, 2184–2199.
- 837 **Xu ZY, Kim DH, Hwang I.** 2013. ABA homeostasis and signaling involving multiple  
838 subcellular compartments and multiple receptors. *Plant Cell Reports* 32, 807-813.
- 839 **Yamaguchi-Shinozaki K, Shinozaki K.** 2006. Transcriptional regulatory networks in  
840 cellular responses and tolerance to dehydration and cold stresses. *Annual Review of Plant*  
841 *Biology* 57, 781-803.
- 842 **Yan J, Zhao C, Zhou J, Yang Y, Wang P, Zhu X, Tang G, Bressan RA, Zhu JK.** 2016.  
843 The miR165/166 Mediated Regulatory Module Plays Critical Roles in ABA Homeostasis  
844 and Response in Arabidopsis thaliana. *PLoS genetics* 12, e1006416.
- 845 **Yao J, Sun D, Cen H, Xu H, Weng H, Yuan F, He Y.** 2018. Phenotyping  
846 of *Arabidopsis* Drought Stress Response Using Kinetic Chlorophyll Fluorescence and  
847 Multicolor Fluorescence Imaging. *Frontiers in plant science* 9, 603.
- 848 **Zhao Y, Zhang Z, Gao J, et al.** 2018. Arabidopsis Duodecuple Mutant of PYL ABA  
849 Receptors Reveals PYL Repression of ABA-Independent SnRK2 Activity. *Cell Reports*  
850 23, 3340-3351.

851 **Zhang R, Sharkey TD.** 2009. Photosynthetic electron transport and proton flux under  
852 moderate heat stress. *Photosynthesis research* 100, 29–43.

853

854



## 855 **FIGURE LEGENDS**

856  
857  
858 **Figure 1.** PSK receptor signaling promotes shoot growth under mannitol stress. Four-day-  
859 old wild type and *pskr1-3 pskr2-1* seedlings were transferred to media containing mannitol  
860 as indicated. (A) Shoot phenotypes of wild type (wt) and *pskr1-3 pskr2-1* plants after 2  
861 weeks growth on mannitol. Scale bars = 10 mm. (B) Leaf numbers, sizes and morphology  
862 of wild type and *pskr1-3 pskr2-1* plants grown on mannitol-free medium or on 50 mM  
863 mannitol for 2 weeks. Scale bar = 10 mm. (C) Average shoot fresh weights ( $\pm$ SE) of plants  
864 grown as in A. (D) Shoot dry weights of plants grown as in A. Significantly different values  
865 within a genotype are denoted by different letters (Kruskal-Wallis, Tukey's test,  $p < 0.05$ ,  
866  $n \geq 36$ , 3 independent experiments). Asterisks indicate significant differences between  
867 genotypes (Mann-Whitney test,  $p < 0.05$ ). (E, F) Size of epidermal cells at the abaxial side.  
868 Plants were grown as in A-D. Single cell outlines are highlighted in bold black lines (scale  
869 bar = 10 nm). Average cell sizes ( $\pm$ SE) of the first true leaf were analyzed from 12  
870 seedlings with 40-50 cells measured per seedling. Significant differences between  
871 treatments are indicated by different letters. Asterisks indicate significant differences  
872 between genotypes (Mann-Whitney test,  $P < 0.05$ ,  $n \geq 1500$ , 3 independent experiments).

873  
874  
875 **Figure 2.** *PSKR1* is crucial for growth promotion under mannitol stress. Four-day-old wild  
876 type, *pskr1-3*, *pskr2-1*, and *pskr1-3 pskr2-1* seedlings were transferred to media with or  
877 without 50 mM mannitol. Mean ( $\pm$ SE) shoot fresh weights of seedlings after 3 weeks.  
878 Different letters indicate significant differences (Kruskal-Wallis, Tukey's test,  $p < 0.05$ ,  
879  $n \geq 36$ , 3 independent experiments).

880  
881  
882 **Figure 3.** Mannitol sensing in roots is independent of *PSKR*s. (A) Seedlings were pre-  
883 grown for 4 days and then transferred to medium supplemented with or without 50 mM  
884 mannitol. Phenotypes of shoots grown on plates with media for 8 days. (B) Seedlings were  
885 grown on plates with excised media at the height of the shoot to prevent direct contact of  
886 the shoot with mannitol (A,B: scale bar = 10 mm). (C) Schematic of the hydroponic system

887 used to apply mannitol to roots. (D) Seedlings were pre-grown for 10 days as shown in C  
888 and then transferred to fresh medium supplemented with or without 50 mM mannitol.  
889 Average shoot fresh weights ( $\pm$ SE) were determined after 2 weeks from 3 independent  
890 experiments (Mann-Whitney test,  $P < 0.05$ ,  $n \leq 45$ ). (E, F) Shoot phenotypes of plants grown  
891 on medium (E) without or (F) with 50 mM mannitol (scale bar = 10 mm).

892  
893  
894 **Figure 4.** PSKR signalling in the shoot promotes growth in response to mannitol. Wild  
895 type shoots were grafted with double receptor knockout roots (*wt + pskr1-3 pskr2-1*) and  
896 vice versa (*pskr1-3 pskr2-1 + wt*) under short day conditions. Successful grafts were  
897 analyzed for shoot fresh weight grown under long day conditions. (A) scheme representing  
898 the grafting procedure. (B) Model to represent labelling. (C, D) Shoot phenotypes of  
899 successful grafts on ( $\pm$ ) 50 mM mannitol plates. Cotyledons of *wt* and *pskr1-3 pskr2-1*  
900 were cut and included as controls (scale bar = 10mm). (E) Average shoot fresh weights  
901 ( $\pm$ SE) of plants supplemented with/without 50 mM mannitol were determined after 2  
902 weeks. Results are averages obtained from three independent experiments. The capital  
903 and minor letters indicate significant differences between genotypes upon control and  
904 mannitol treatments respectively (Kruskal-Wallis test  $P < 0.05$ ,  $n \geq 24$ ) and asterisk indicate  
905 significant differences within treatments for a particular genotype (Mann-Whitney test,  
906  $P < 0.05$ )

907  
908  
909 **Figure 5:** PSK receptor signaling provides drought stress tolerance. (A) Phenotypes of  
910 plants exposed to mild drought stress (scale bar = 3 cm). Plants were watered with 50 ml  
911 every 3 days for 3 weeks, soil water-saturated for 3 days and subsequently watered with  
912 5 ml every 3 days for another three weeks or with 50 ml as a control. (B) Average ( $\pm$ SE)  
913 shoot fresh weights of wild type and *pskr1-3 pskr2-1* plants obtained from three  
914 independent experiments (Mann-Whitney test,  $P < 0.01$ ,  $n \geq 36$ ). (C) Representative  
915 chlorophyll fluorescence images of drought exposed plants displaying the maximum  
916 quantum yield of PS II,  $F_v/F_m$ . (D)  $F_v/F_m$  ratio ( $\pm$ SE) of control and drought-stressed wild

917 type and mutant plants (Mann-Whitney test,  $**P<0.001$ ,  $n\geq 36$ ). (E)  $\Delta F/Fm'$  ratio (Mann-  
918 Whitney test,  $**P<0.01$ ,  $n\geq 36$ ).

919  
920  
921 **Figure 6.** *PSKR1* expression is induced by mannitol and ABA. (A-F) *PSKR1:GUS-4*  
922 activity in 7-day-old seedlings treated with 50 mM mannitol for 1 day or left untreated as  
923 a control. (A-C) Expression in shoot, and root under control conditions. (D-F) Expression  
924 in shoot, and root under mannitol. Arrowheads point at true leaves; scale bar = 0.5 mm  
925 (A, D), = 0.1 mm (B, E), = 2 mm (C, F). (G) *PSKR2:GUS-3* activity in the shoot; scale bar  
926 = 0.5 mm. (H) Shoot tissue samples of 18-day-old plants analyzed for the expression of  
927 *PSKR1* and *PSKR2* under 300 mM mannitol treatment. Microarray data obtained from  
928 Arabidopsis efp browser 2.0 database available online (<http://www.bar.utoronto.ca/>)  
929 (Kilian *et al.*, 2007). (I, J) Seven-day-old seedlings exposed to 50 mM, 200 mM mannitol,  
930 1  $\mu$ M or 5  $\mu$ M ABA for 1 day or left untreated as a control. Relative transcript levels of (H)  
931 *PSKR1* and (I) *PSKR2* were analyzed by RT-qPCR in true leaves. Values are means  
932 ( $\pm$ SE); different letters indicate significant differences (one-way ANOVA, Tukey's test,  
933  $P<0.05$ , 3 biological replicates).

934  
935  
936 **Figure 7.** *PSK* genes are differentially regulated by mannitol, ABA and *PSKR* signaling.  
937 (A) GUS staining of *PSK1:GUS-3*, *PSK2:GUS-2*, *PSK3:GUS-3*, *PSK4:GUS-4* and  
938 *PSK5:GUS-1* seedlings; scale bar = 2 mm. (B-F) Seven-day-old seedlings were exposed  
939 to 200 mM mannitol or 5  $\mu$ M ABA for 1 day for qPCR analyses in first true leaves. Results  
940 ( $\pm$ SE) are averages from 3 biological replicates with two technical repeats each. Different  
941 letters indicate significant differences. (B) Transcript levels of *PSK* genes relative to *PSK3*  
942 that was set to 1. (C-F) Relative transcript levels of *PSK1-5* in wild type and in *pskr1-3*  
943 *pskr2-1* seedlings treated with mannitol or ABA as indicated (B, F: Kruskal-Wallis, Tukey's  
944 test,  $P<0.05$ ; C-E: one-way ANOVA, Tukey's test,  $P<0.05$ ).

945  
946  
947

948 **Figure 8.** Mannitol-induced ABA accumulation in the shoot is PSKR-dependent. (A) Four-  
949 day-old wild type and *pskr1-3 pskr2-1* seedlings were transferred to 0 mM, 50 mM or 200  
950 mM mannitol and ABA levels in the shoot were determined after 7 days. Different capital  
951 and minor letters indicate statistically significant differences between treatments (Kruskal-  
952 Wallis, Tukey's test,  $P < 0.05$ , 5 biological replicates). Asterisks indicate significant  
953 differences between genotypes per treatment (Mann-Whitney test,  $P < 0.05$ ,  $n = 6$ ). (B) ABA  
954 levels in the first true leaf were compared by photobleaching-based FRET analysis in wild  
955 type and *pskr1-3 pskr2-1* seedlings treated as in A. Decreased FRET efficiency indicates  
956 elevated ABA levels. Values are averages ( $\pm$ SE). Different capital and minor letters  
957 indicate significantly different values between treatments and asterisk indicate significant  
958 differences between genotypes for a specific treatment (Mann-Whitney test,  $P < 0.05$ ,  
959  $n \geq 142$ , 3 independent experiments). (C, D) Transcript of the ABA synthesis genes *AAO1*  
960 and *AAO2* were determined by RT-qPCR in true leaves of 4-day-old seedlings transferred  
961 to mannitol for another 3 days as indicated. Significantly different values for wt and *pskr1-3*  
962 *pskr2-1* are represented by capital (one-way ANOVA with Tukey's test,  $P < 0.05$ ,  $n = 6$ )  
963 and minor letters (Mann-Whitney test,  $P < 0.05$ ,  $n = 6$ ). Asterisks indicate significant  
964 differences between genotypes at given treatment (Mann-Whitney test,  $P < 0.05$ ,  $n = 6$ ).

965  
966  
967 **Figure 9.** PSKR and ABA pathways partially interact. (A, B) Shoot fresh weights of wild  
968 type and *pskr1-3 pskr2-1* seedlings that were transferred after 4 days to plates containing  
969 ABA and mannitol as indicated were determined after 2 weeks (Kruskal-Wallis, Tukey's  
970 test,  $P < 0.05$ ;  $n = 36$ ). (C, D) Phenotypes of seedlings analyzed in A, B. (E, F) Relative  
971 expression ( $\pm$ SE) of *ABI1* and *ABI2* in true leaves of 4-day-old seedlings grown on  
972 mannitol for another 3 days. Significantly different values for wild type and *pskr1-3 pskr2-1*  
973 are represented by capital and minor letters (Mann-Whitney test,  $P < 0.05$ ,  $n = 6$ ). Asterisks  
974 indicate significant differences between genotypes at a given treatment (Mann-Whitney  
975 test,  $P < 0.05$ ,  $n = 6$ ).

976  
977  
978

979 **Figure 10. Model of shoot growth control during mannitol stress by PSKR1 and**  
980 **ABA.**

981 Mannitol induces *PSKR1* and *PSK3* gene expression and PSKR signaling promotes ABA  
982 synthesis, through upregulation of the ABA synthesis gene *AAO2*, and ABA signaling,  
983 through repression of *ABI1* and *ABI2*. In mutants that lack PSKRs, reduced ABA in  
984 mannitol-stressed shoots contributes to shoot growth inhibition. Growth under mannitol  
985 stress is further promoted by ABA-independent PSKR signaling.

986

987

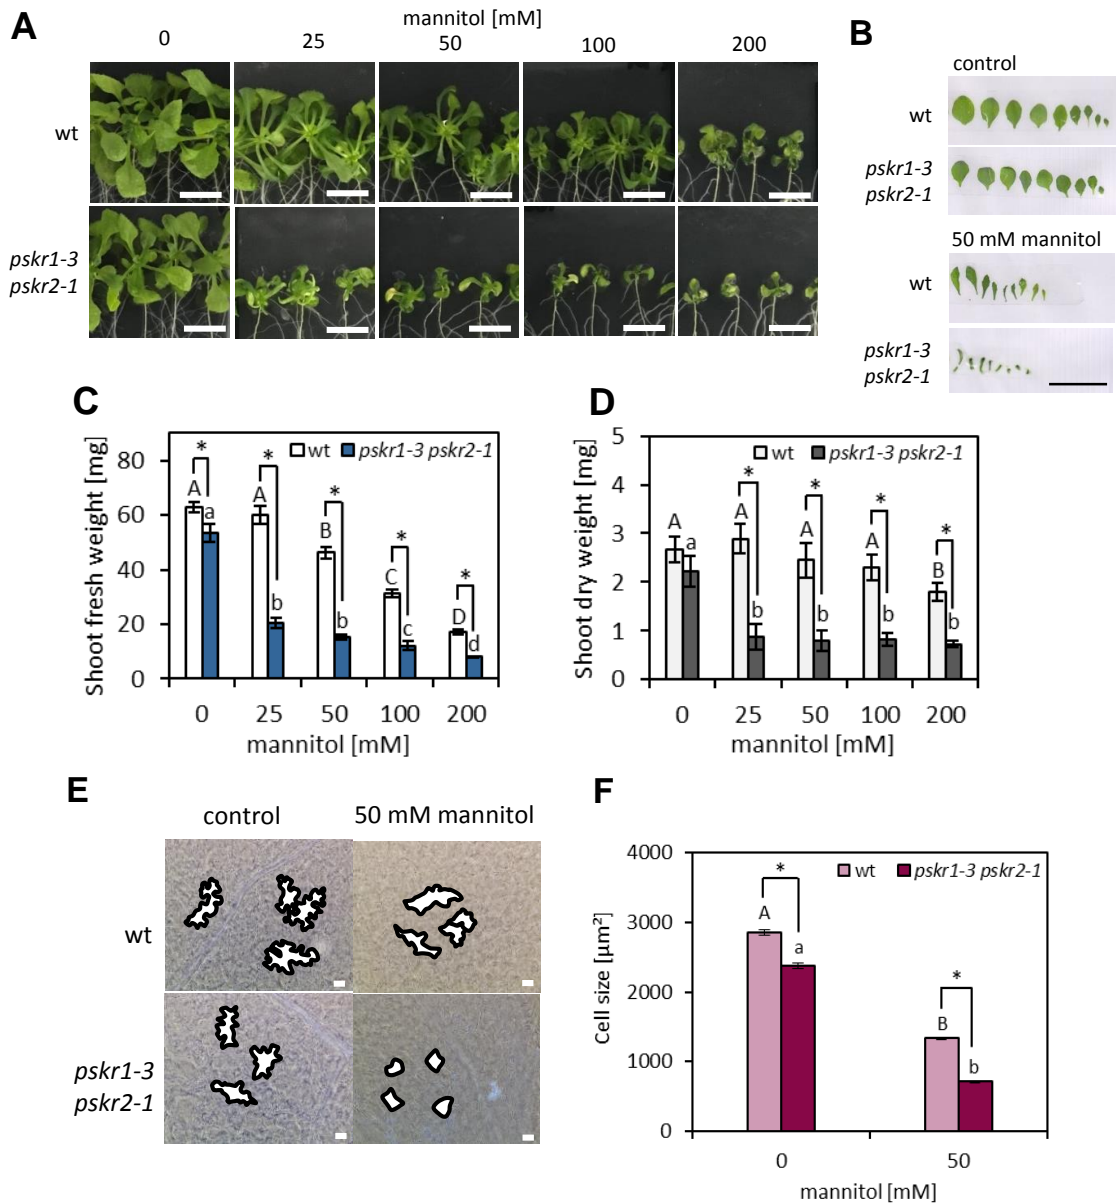

**Figure 1.** PSK receptor signaling promotes shoot growth under mannitol stress. Four-day-old wild type and *pskr1-3 pskr2-1* seedlings were transferred to media containing mannitol as indicated. (A) Shoot phenotypes of wild type (wt) and *pskr1-3 pskr2-1* plants after 2 weeks growth on mannitol. Scale bars = 10 mm. (B) Leaf numbers, sizes and morphology of wild type and *pskr1-3 pskr2-1* plants grown on mannitol-free medium or on 50 mM mannitol for 2 weeks. Scale bar = 10 mm. (C) Average shoot fresh weights ( $\pm$ SE) of plants grown as in A. (D) Shoot dry weights of plants grown as in A. Significantly different values within a genotype are denoted by different letters (Kruskal-Wallis, Tukey's test,  $p < 0.05$ ,  $n \geq 36$ , 3 independent experiments). Asterisks indicate significant differences between genotypes (Mann-Whitney test,  $p < 0.05$ ). (E, F) Size of epidermal cells at the abaxial side. Plants were grown as in A-D. Single cell outlines are highlighted in bold black lines (scale bar = 10 nm). Average cell sizes ( $\pm$ SE) of the first true leaf were analyzed from 12 seedlings with 40-50 cells measured per seedling. Significant differences between treatments are indicated by different letters. Asterisks indicate significant differences between genotypes (Mann-Whitney test,  $P < 0.05$ ,  $n \geq 1500$ , 3 independent experiments).

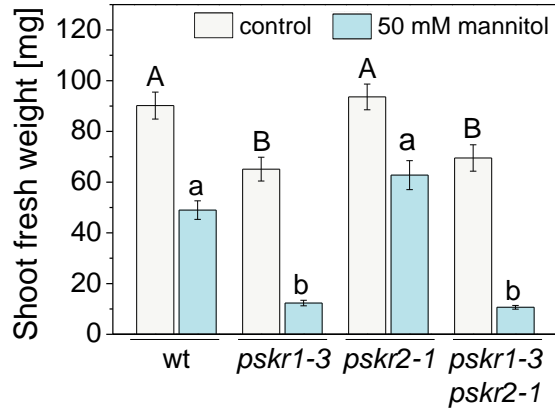

**Figure 2.** *PSKR1* is crucial for growth promotion under mannitol stress. Four-day-old wild type, *pskr1-3*, *pskr2-1*, and *pskr1-3 pskr2-1* seedlings were transferred to media with or without 50 mM mannitol. Mean ( $\pm$ SE) shoot fresh weights of seedlings after 3 weeks. Different letters indicate significant differences (Kruskal-Wallis, Tukey's test,  $p < 0.05$ ,  $n \geq 36$ , 3 independent experiments).



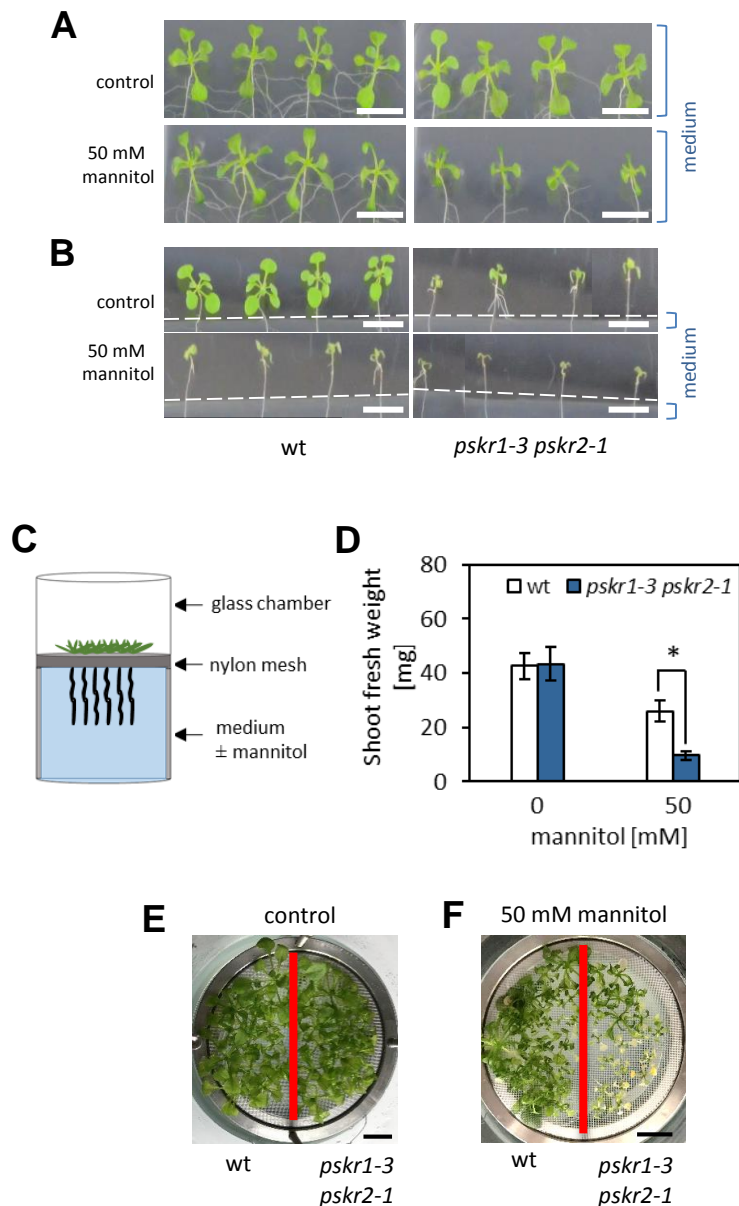

**Figure 3.** Mannitol sensing in roots is independent of *PSKR*s. (A) Seedlings were pre-grown for 4 days and then transferred to medium supplemented with or without 50 mM mannitol. Phenotypes of shoots grown on plates with media for 8 days. (B) Seedlings were grown on plates with excised media at the height of the shoot to prevent direct contact of the shoot with mannitol (A,B: scale bar = 10 mm). (C) Schematic of the hydroponic system used to apply mannitol to roots. (D) Seedlings were pre-grown for 10 days as shown in C and then transferred to fresh medium supplemented with or without 50 mM mannitol. Average shoot fresh weights ( $\pm$ SE) were determined after 2 weeks from 3 independent experiments (Mann-Whitney test,  $P < 0.05$ ,  $n \leq 45$ ). (E, F) Shoot phenotypes of plants grown on medium (E) without or (F) with 50 mM mannitol (scale bar = 10 mm).

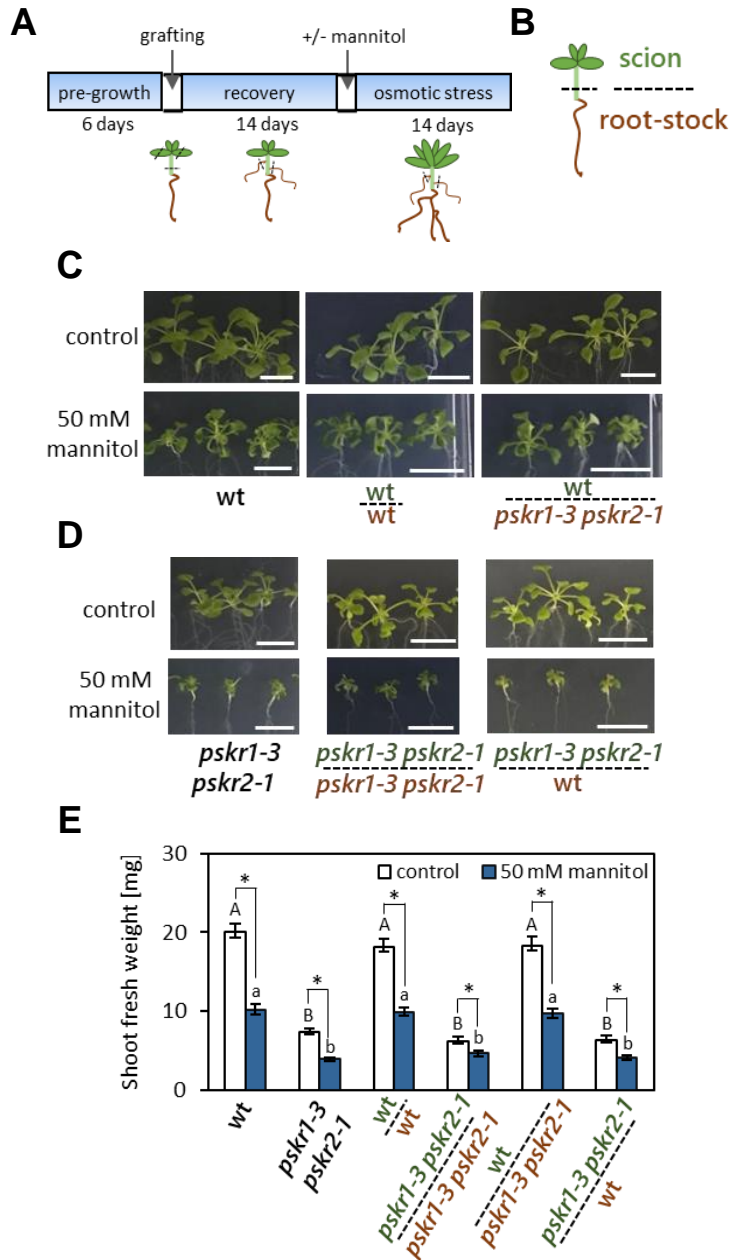

**Figure 4.** PSKR signalling in the shoot promotes growth in response to mannitol. Wild type shoots were grafted with double receptor knockout roots ( $wt + pskr1-3 pskr2-1$ ) and vice versa ( $pskr1-3 pskr2-1 + wt$ ) under short day conditions. Successful grafts were analyzed for shoot fresh weight grown under long day conditions. (A) scheme representing the grafting procedure. (B) Model to represent labelling. (C, D) Shoot phenotypes of successful grafts on ( $\pm$ ) 50 mM mannitol plates. Cotyledons of  $wt$  and  $pskr1-3 pskr2-1$  were cut and included as controls (scale bar = 10mm). (E) Average shoot fresh weights ( $\pm$ SE) of plants supplemented with/without 50 mM mannitol were determined after 2 weeks. Results are averages obtained from three independent experiments. The capital and minor letters indicate significant differences between genotypes upon control and mannitol treatments respectively (Kruskal-Wallis test  $P < 0.05$ ,  $n \geq 24$ ) and asterisk indicate significant differences within treatments for a particular genotype (Mann-Whitney test,  $P < 0.05$ )

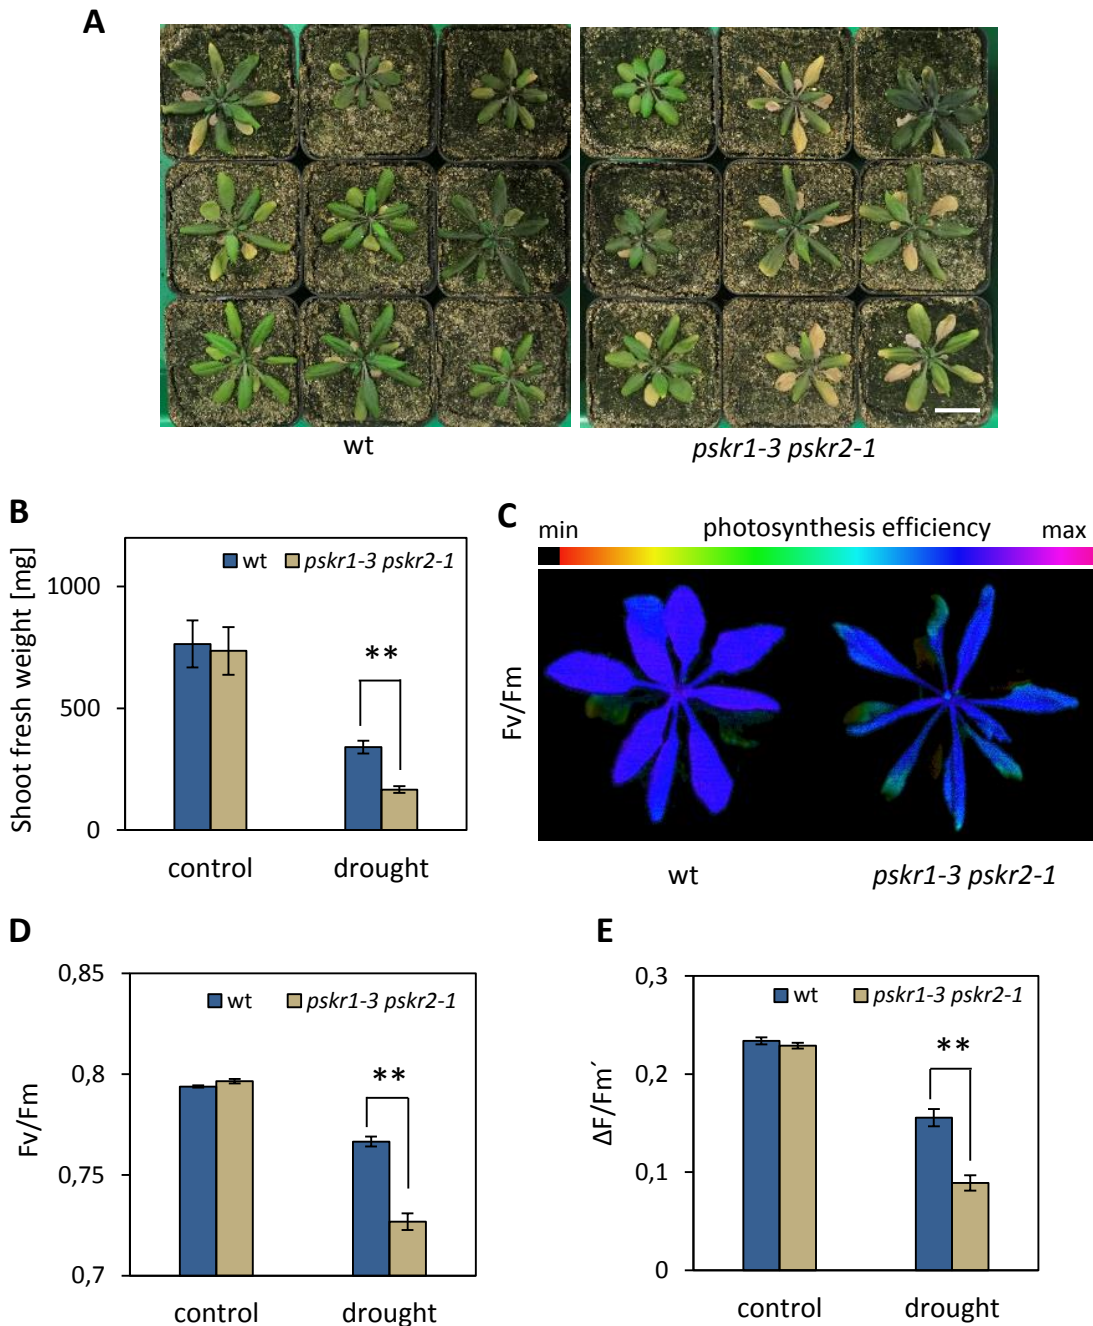

**Figure 5:** PSK receptor signaling provides drought stress tolerance. (A) Phenotypes of plants exposed to mild drought stress (scale bar = 3 cm). Plants were watered with 50 ml every 3 days for 3 weeks, soil water-saturated for 3 days and subsequently watered with 5 ml every 3 days for another three weeks or with 50 ml as a control. (B) Average ( $\pm$ SE) shoot fresh weights of wild type and *pskr1-3 pskr2-1* plants obtained from three independent experiments (Mann-Whitney test,  $P < 0.01$ ,  $n \geq 36$ ). (C) Representative chlorophyll fluorescence images of drought exposed plants displaying the maximum quantum yield of PS II, Fv/Fm. (D) Fv/Fm ratio ( $\pm$ SE) of control and drought-stressed wild type and mutant plants (Mann-Whitney test,  $**P < 0.001$ ,  $n \geq 36$ ). (E)  $\Delta F/Fm'$  ratio (Mann-Whitney test,  $**P < 0.01$ ,  $n \geq 36$ ).

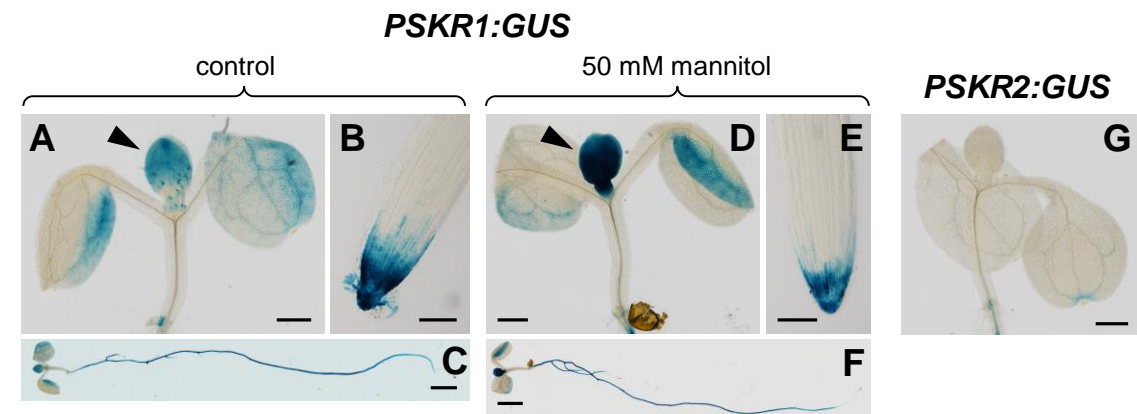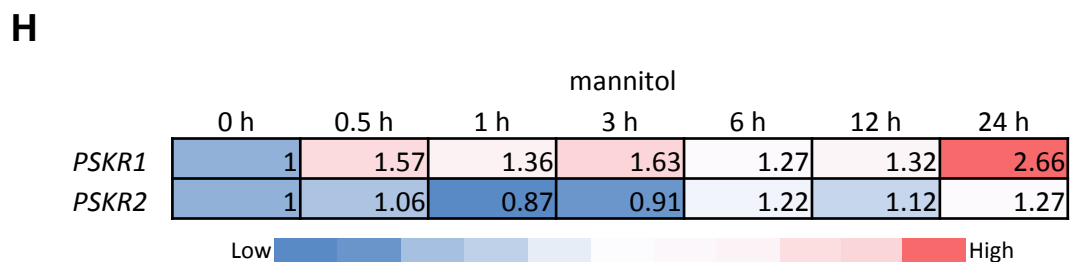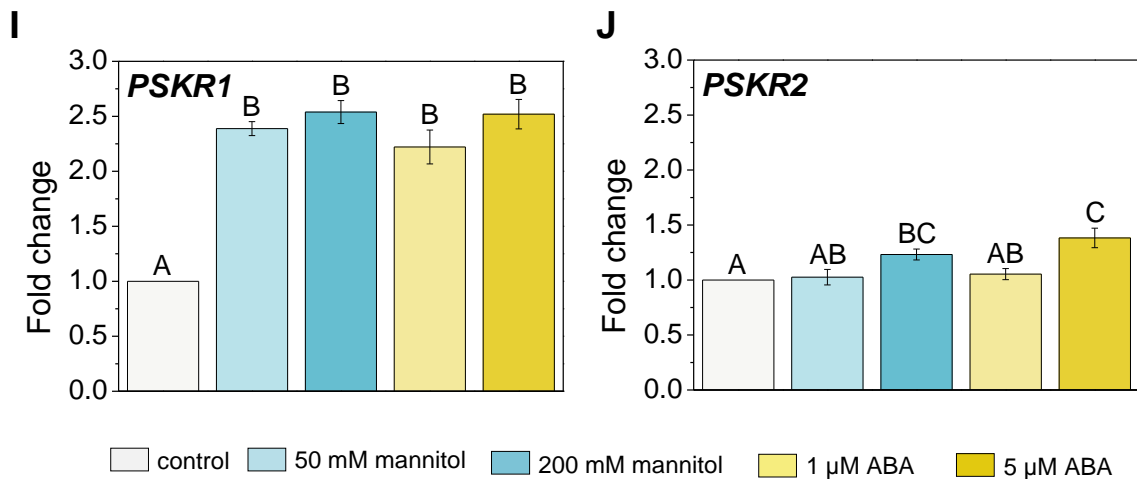

**Figure 6.** *PSKR1* expression is induced by mannitol and ABA. (A-F) *PSKR1:GUS-4* activity in 7-day-old seedlings treated with 50 mM mannitol for 1 day or left untreated as a control. (A-C) Expression in shoot, and root under control conditions. (D-F) Expression in shoot, and root under mannitol. Arrowheads point at true leaves; scale bar = 0.5 mm (A, D), = 0.1 mm (B, E), = 2 mm (C, F). (G) *PSKR2:GUS-3* activity in the shoot; scale bar = 0.5 mm. (H) Shoot tissue samples of 18-day-old plants analyzed for the expression of *PSKR1* and *PSKR2* under 300 mM mannitol treatment. Microarray data obtained from Arabidopsis efp browser 2.0 database available online (<http://www.bar.utoronto.ca/>) (Kilian et al., 2007). (I, J) Seven-day-old seedlings exposed to 50 mM, 200 mM mannitol, 1  $\mu$ M or 5  $\mu$ M ABA for 1 day or left untreated as a control. Relative transcript levels of (H) *PSKR1* and (I) *PSKR2* were analyzed by RT-qPCR in true leaves. Values are means ( $\pm$ SE); different letters indicate significant differences (one-way ANOVA, Tukey's test,  $P < 0.05$ , 3 biological replicates).

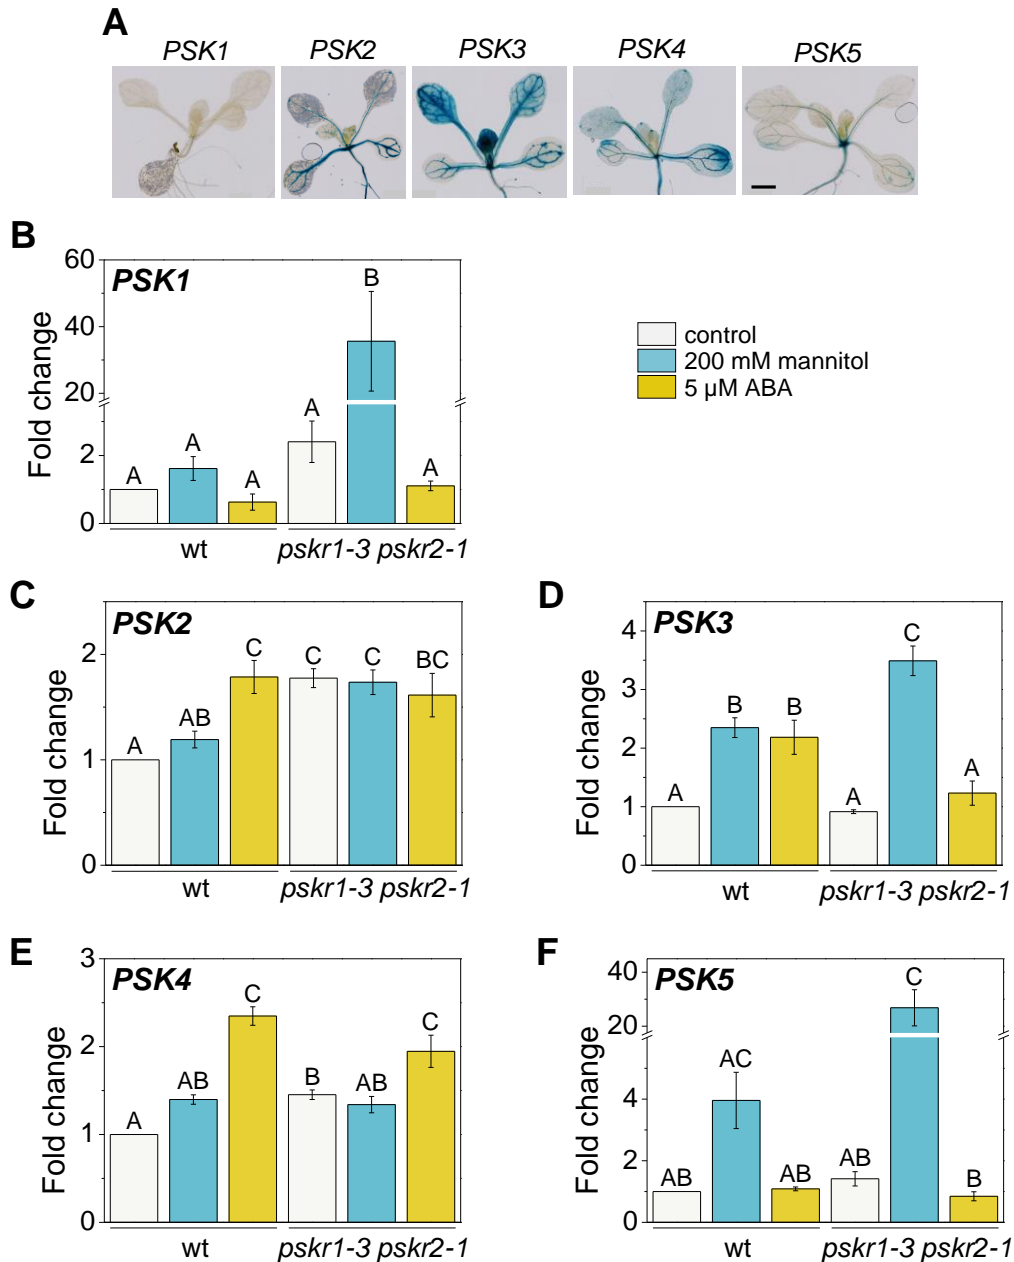

**Figure 7.** *PSK* genes are differentially regulated by mannitol, ABA and *PSKR* signaling. (A) GUS staining of *PSK1:GUS-3*, *PSK2:GUS-2*, *PSK3:GUS-3*, *PSK4:GUS-4* and *PSK5:GUS-1* seedlings; scale bar = 2 mm. (B-F) Seven-day-old seedlings were exposed to 200 mM mannitol or 5 μM ABA for 1 day for qPCR analyses in first true leaves. Results (±SE) are averages from 3 biological replicates with two technical repeats each. Different letters indicate significant differences. (B) Transcript levels of *PSK* genes relative to *PSK3* that was set to 1. (C-F) Relative transcript levels of *PSK1-5* in wild type and in *pskr1-3 pskr2-1* seedlings treated with mannitol or ABA as indicated (B, F: Kruskal-Wallis, Tukey's test,  $P < 0.05$ ; C-E: one-way ANOVA, Tukey's test,  $P < 0.05$ ).

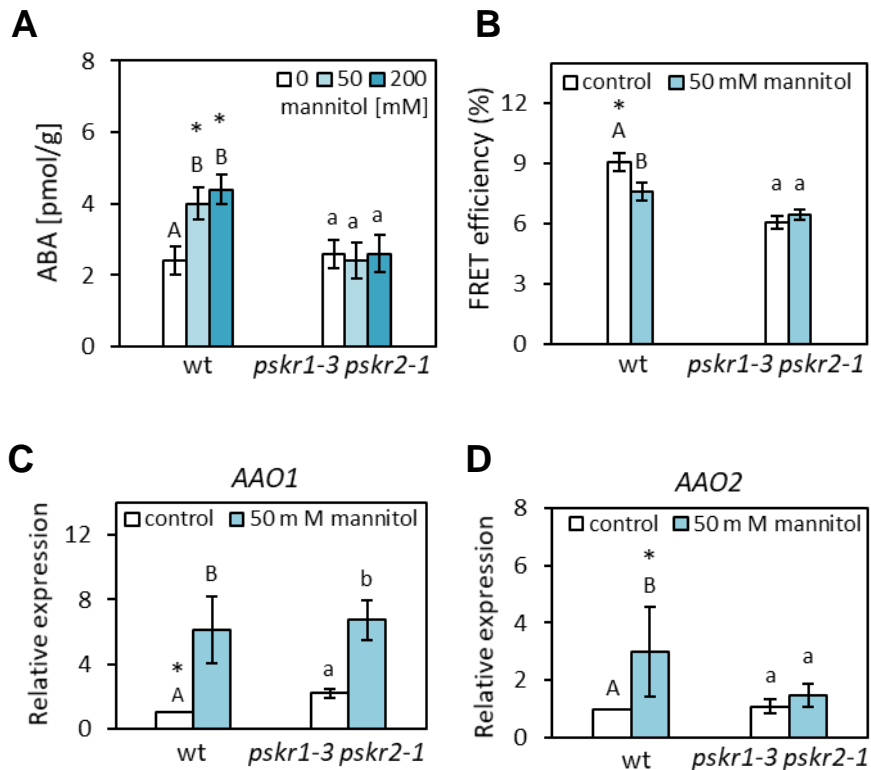

**Figure 8.** Mannitol-induced ABA accumulation in the shoot is PSKR-dependent. (A) Four-day-old wild type and *pskr1-3 pskr2-1* seedlings were transferred to 0 mM, 50 mM or 200 mM mannitol and ABA levels in the shoot were determined after 7 days. Different capital and minor letters indicate statistically significant differences between treatments (Kruskal-Wallis, Tukey's test,  $P < 0.05$ , 5 biological replicates). Asterisks indicate significant differences between genotypes per treatment (Mann-Whitney test,  $P < 0.05$ ,  $n = 6$ ). (B) ABA levels in the first true leaf were compared by photobleaching-based FRET analysis in wild type and *pskr1-3 pskr2-1* seedlings treated as in A. Decreased FRET efficiency indicates elevated ABA levels. Values are averages ( $\pm$ SE). Different capital and minor letters indicate significantly different values between treatments and asterisk indicate significant differences between genotypes for a specific treatment (Mann-Whitney test,  $P < 0.05$ ,  $n \geq 142$ , 3 independent experiments). (C, D) Transcript of the ABA synthesis genes *AAO1* and *AAO2* were determined by RT-qPCR in true leaves of 4-day-old seedlings transferred to mannitol for another 3 days as indicated. Significantly different values for wt and *pskr1-3 pskr2-1* are represented by capital (one-way ANOVA with Tukey's test,  $P < 0.05$ ,  $n = 6$ ) and minor letters (Mann-Whitney test,  $P < 0.05$ ,  $n = 6$ ). Asterisks indicate significant differences between genotypes at given treatment (Mann-Whitney test,  $P < 0.05$ ,  $n = 6$ ).



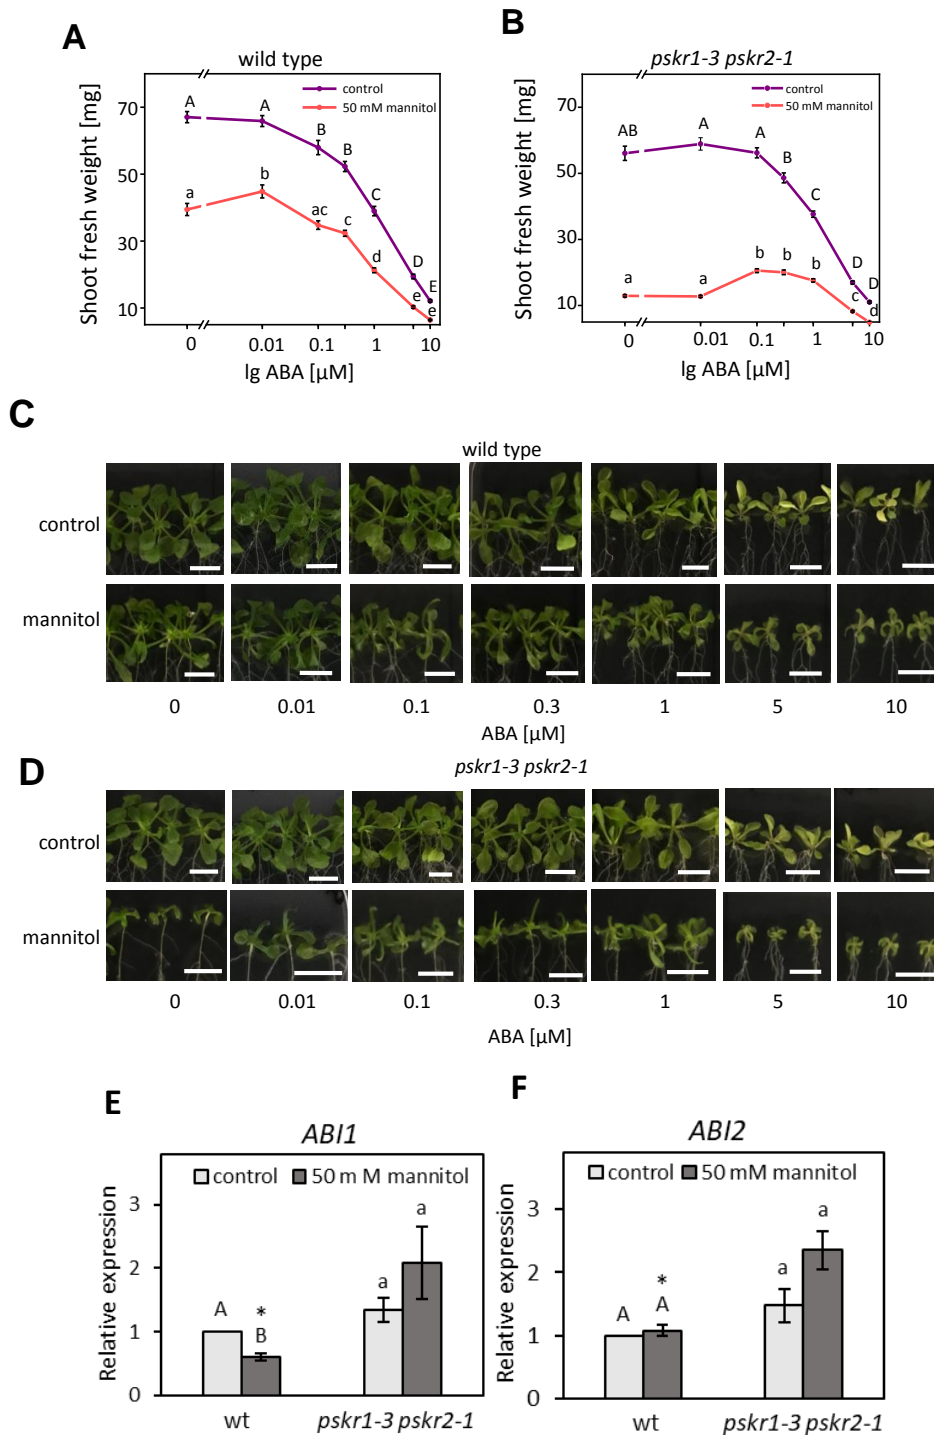

**Figure 9.** PSKR and ABA pathways partially interact. (A, B) Shoot fresh weights of wild type and *pskr1-3 pskr2-1* seedlings that were transferred after 4 days to plates containing ABA and mannitol as indicated were determined after 2 weeks (Kruskal-Wallis, Tukey's test,  $P < 0.05$ ;  $n = 36$ ). (C, D) Phenotypes of seedlings analyzed in A, B. (E, F) Relative expression ( $\pm$ SE) of *ABI1* and *ABI2* in true leaves of 4-day-old seedlings grown on mannitol for another 3 days. Significantly different values for wild type and *pskr1-3 pskr2-1* are represented by capital and minor letters (Mann-Whitney test,  $P < 0.05$ ,  $n = 6$ ). Asterisks indicate significant differences between genotypes at a given treatment (Mann-Whitney test,  $P < 0.05$ ,  $n = 6$ ).



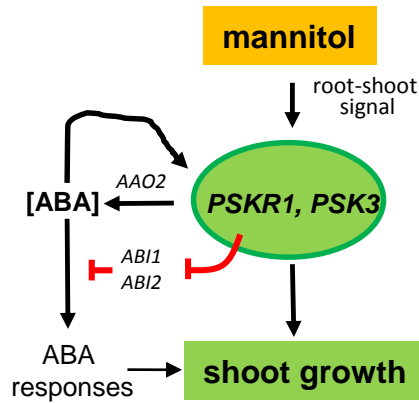

**Figure 10.** Model of shoot growth control during mannitol stress by PSKR1 and ABA. Mannitol induces *PSKR1* and *PSK3* gene expression and PSKR signaling promotes ABA synthesis, through upregulation of the ABA synthesis gene *AAO2*, and ABA signaling, through repression of *ABI1* and *ABI2*. In mutants that lack PSKR1 and PSK3, reduced ABA in mannitol-stressed shoots contributes to shoot growth inhibition. Growth under mannitol stress is further promoted by ABA-independent PSKR signaling.
